# Supplementary material for: Subtypes and proliferation patterns of small intestine neuroendocrine tumors revealed by single-cell RNA sequencing
Source: eLife. 2025 Jul 23;13:RP101153. doi: 10.7554/eLife.101153 (PMC12286602; doi:10.7554/eLife.101153)
Supplement: Supplementary file 1. [file elife-101153-supp1.xlsx]

## Sheet: Sheet1
Patient	Sample	Type	KI67 (%)	Mitoses	Grade	Stage	Intervention before surgery	Intervention during surgery
P1	SINET1	Fresh	<3%	<2	1	IV	Somatostatin analogues	Somatostatin analogues
P2	SINET2	Fresh	0.02	2	2	IV	Somatostatin analogues	Somatostatin analogues
P3	SINET3	Fresh	<1%	None	1	IV	Somatostatin analogues	Somatostatin analogues
P4	SINET4	Frozen	<3%	<2	1	IV	Somatostatin analogues	Somatostatin analogues
P5	SINET5	Frozen	0.09	<2	2	IV	Somatostatin analogues	Somatostatin analogues
P1	SINET6	Frozen	<3%	<2	1	IV	Somatostatin analogues	Somatostatin analogues
P6	SINET7	Frozen	<3%	<2	1	IV	Somatostatin analogues	Somatostatin analogues
P3	SINET8	Frozen	<1%	None	1	IV	Somatostatin analogues	Somatostatin analogues
P7	SINET9	Frozen	0.04	None	2	IV	Somatostatin analogues	Somatostatin analogues
P8	SINET10	Frozen	<2%	<1	1	IV	NA	NA
