# Supplementary material for: Subtypes and proliferation patterns of small intestine neuroendocrine tumors revealed by single-cell RNA sequencing
Source: eLife. 2025 Jul 23;13:RP101153. doi: 10.7554/eLife.101153 (PMC12286602; doi:10.7554/eLife.101153)
Supplement: Supplementary file 2. [file elife-101153-supp2.xlsx]

## Sheet: table_S2
T_cells	Macrophages	epithelial	Endothelial	B_cells	NE	Fibroblast	Plasma	Cell_Cycle	Senescence
CD2	CD14	EPCAM	VWF	CD19	CHGA	VIM	JCHAIN	TOP2A	S100A8
CD3D	CD86	SFN	PECAM1	MS4A1	CHGB	ACTA2	MZB1	CDK1	S100A9
CD3E	TYROBP	KRT5	CDH5	CD79A	SYT1	COL1A1	TNFRSF17	AURKB	SPRR1B
CD3G	AIF1	KRT6	CLDN5	CD79B	TTR	COL1A2	NA	MCM2	LCN2
NKG7	C1QA	KRT6B	PLVAP	CD38	SOX4	TAGLN	NA	AURKA	NA
PRF1	C1QB	KRT14	EGFL7	BANK1	CD24	FN1	NA	TROAP	NA
CD8A	CD163	KRT19	ESAM	VPREB3	STMN1	NA	NA	CENPF	NA
CD8B	CSF1R	KRT16	NA	NA	HES6	NA	NA	MKI67	NA
LAG3	FCER1G	KRT17	NA	NA	SCGN	NA	NA	NA	NA
PDCD1	NA	KRT18	NA	NA	SCG2	NA	NA	NA	NA
GZMA	NA	NA	NA	NA	SCG3	NA	NA	NA	NA
GZMB	NA	NA	NA	NA	SCG5	NA	NA	NA	NA
NA	NA	NA	NA	NA	KRT8	NA	NA	NA	NA
