# Supplementary material for: Subtypes and proliferation patterns of small intestine neuroendocrine tumors revealed by single-cell RNA sequencing
Source: eLife. 2025 Jul 23;13:RP101153. doi: 10.7554/eLife.101153 (PMC12286602; doi:10.7554/eLife.101153)
Supplement: Supplementary file 3. [file elife-101153-supp3.xlsx]

## Sheet: Common
common
CHGA
TPH1
CHGB
HIPK2
RIMBP2
CADPS
CDHR3
STXBP5L
PCSK2
SYT13
SLC18A1
SLC38A11
RAB3C
RAB3B
PTPRN2
MS4A8
KCNJ3
SHTN1
RIMS2
GPM6A
COBL
SNTG1
KIAA1324
DACH1
AKAP6
PCLO
CDHR5
ST18
MYT1L
DAB1
DSCAM
CTNND2
KCNH6
UNC79

## Sheet: Subset-Specific 
pattern 1	pattern 2	pattern 3	pattern 4	pattern 5	pattern 6	pattern 7	pattern 8	pattern 9
TTR	NRG1	TRPM3	RABGEF1	PTPRT	SPAG16	NRXN3	FGF14	CCSER1
HSP90AB1	AGBL4	HS6ST3	PNPLA7	MAST4	KCNMB2	KIRREL3	HCN1	ACSF2
S100A6	KCNB2	SEMA6D	XYLT1	FRMD4B	DLG2	NLGN1	STUM	ADGRG4
HSP90AA1	PTPRD	NCKAP5	CASZ1	NAV2	HIVEP3	FGF13	RIMS1	WNK2
MIF	RGS7	FREM1	RAP1GAP2	KIAA1217	ST6GALNAC5	PLD5
PCSK1N	LMX1A	ADGRV1	SIPA1L3	TRIM2	RTN1	PCED1B
PHGR1	DNAH14	PWRN1	TTLL6	ATXN2	ANK3
SERPINA1	ZMAT4	FMN2	PTPRJ		KCNMA1
GABARAP	DANT2	ABTB2	MTSS1
ATP5F1E	MAPK10	SV2C
FAU	KSR2	PAM
TAC1	SPATA13	UNC13B
SERF2	STK33	PDE4DIP
CKB	SAMD12
CALM1	NFASC
UBA52	NBEA
KRT8	MCF2L
ELOB	RALGPS1
BEX1	GIPR
FXYD3	NRCAM
COX4I1	GNAO1
SRP14	LRIG1
PEBP1	GCNT2
EPCAM
TMEM59
DDX24
pattern 1	pattern 2	pattern 3	pattern 4	pattern 5	pattern 6	pattern 7	pattern 8	pattern 9
SINET1	SINET4	SINET4	SINET4	SINET4	SINET4	SINET4	SINET4	SINET4
SINET2	SINET5	SINET5	SINET5	SINET5	SINET5	SINET5	SINET10	SINET8
SINET9	SINET8	SINET10	SINET7	SINET7	SINET8
	SINET10		SINET8	SINET8	SINET9
			SINET10		SINET10

## Sheet: tumor-specific
SINET1	SINET2	SINET4	SINET5	SINET7	SINET8	SINET9	SINET10
ATP1B1	APOD	ABCA5	CALCR	ABCB1	ABAT	APOA1	ABCC5
BTG2	CAMK2D	CELF3	DOCK8	ATXN2	ABCA7	ATP5F1E	ACOT12
CALB1	ENDOD1	CNKSR3	FAM155A	CLEC3A	ABCC6	AZGP1	ADAMTS2
CPEB4	ERRFI1	CREB3L1	HDAC9	CSMD1	ACSL1	BEX2	AFF2
EGR3	FKBP5	FAM163A	KHDRBS2	MTRNR2L8	ANKS1B	BEX3	AHCYL2
EGR4	FMO5	GRIA3	KIF13B	PRRC2C	AP1G2	CALM1	ALCAM
ELF3	IDS	LRFN2	NAV2	RBM25	ATP2B2	COX4I1	ANK2
HSPA1B	ITM2C	MAPKAPK2	NBEA	SGSM1	CASTOR3	COX5B	ANKH
PEG3	MT1E	MYO7B	NEDD4L	SLC26A3	CRY2	COX6A1	ARHGEF28
PGRMC2	MT1F	NLGN1	NEGR1	SLC7A2	CSMD3	COX7C	ASTN1
	NAIP	PDZRN4	PCED1B	TNK2	CTBP1	COX8A	BACE1
	NEUROD1	PHF21B	RBM47	UNC13A	DENND2A	CYP3A4	C6orf141
	OTULINL	PLPPR1	SYT1		DLG5	DDX24	CADM1
	PPM1B	PLXNA2	TMEM108		ENPP6	DNAH5	CCBE1
	RAMP1	PRKCA	ZNF385B		EPS8L2	DPEP1	CELF4
	SCG3	PRKG2			EPS8L3	ELOB	CERKL
	SEZ6L2	RET			FBRSL1	FAU	CERS6
	SLC37A4	SLC24A2			FGFR3	FAXDC2	CGNL1
	STIM2	SLC6A15			FOXP4	GABARAP	CHD7
	TEAD1	SMOC1			GP1BB	GPX4	CHST8
	TFF3	SYN2			HNF4A	H2AFJ	CLVS1
	TMEM141	XYLT1			ICA1	HINT1	CNGB1
	TMX4				INTS4	HSP90AA1	CNTN4
	UGT2B7				KIAA1217	HSP90AB1	CRISPLD1
					KIF1A	HSPE1	CYFIP2
					LRIG1	IFI27	DCC
					MARCH1	IFI27L2	DGKB
					MLPH	LGALS4	DOC2B
					MYT1	MIF	DTNA
					NOL4L	MROH2A	DZIP3
					NSUN7	NDUFA13	EBF3
					PLEKHA7	NDUFS5	EFNA5
					PLEKHG3	PCDH20	EML6
					PLXNB1	PEBP1	ENPP1
					PPL	PHACTR3	ERC2
					PPP6R2	PKM	ERICH3
					SDK1	PRDX5	EYS
					SGSM2	QDPR	FAM160A1
					SHISA9	REG4	FAM49B
					SLC12A8	S100A6	FHOD3
					SRRM3	SERF2	FRY
					STPG2	SOD1	FSD1L
					TAFA5	SPINT2	FSTL4
					TBC1D1	SRP14	GALNT13
					TMEFF2	TM4SF5	GLYATL3
					TPCN1	TMEM176B	GNG7
					VAV2	TMEM59	GRAMD1B
					VIL1	UBA52	GRAMD2B
					ZNF512B	UQCR10	GRIK2
					ZNF69		GRIP1
					ZNF721		GRK3
							GYG2
							HECW2
							IGDCC3
							INSYN2A
							KCNQ3
							KIAA0408
							KIAA1211L
							KIAA1549
							KIAA1549L
							L3MBTL4
							LDB3
							LMO1
							LRP8
							MAGI1
							MAP1B
							MAP3K4
							MAP6
							MAPK4
							MARCH4
							MARK1
							MBOAT2
							MCOLN3
							MEGF11
							MLXIPL
							MYO16
							NALCN
							NINL
							NOL4
							NOS1AP
							NYAP2
							PDE4DIP
							PEX5L
							PLCL2
							PLCXD3
							PLXNC1
							PPP1R14C
							PPP1R9A
							PSD3
							PTPRJ
							PWRN4
							RAB26
							RAPGEF4
							RGS9
							RMST
							RNF130
							ROR1
							SATB2
							SH3GL2
							SHANK2
							SLC16A9
							SLC29A4
							SMIM35
							SNAP91
							SOBP
							SOGA3
							SORL1
							SOX6
							SVOP
							TENM1
							TMEM196
							TMPRSS6
							TNIK
							TNS3
							TSPAN5
							TTC3
							UNC13B
							VAT1L
							VWC2L
							VWDE
							WASF3
							ZFHX3
							ZNF608
