# Supplementary material for: Subtypes and proliferation patterns of small intestine neuroendocrine tumors revealed by single-cell RNA sequencing
Source: eLife. 2025 Jul 23;13:RP101153. doi: 10.7554/eLife.101153 (PMC12286602; doi:10.7554/eLife.101153)
Supplement: Supplementary file 4. — Only genes with at least sixfold differential expression are listed. For each of those genes, log2-fold change, t-test p-value, and FDR-adjusted p-values are listed, and genes with unadjusted p-value below 0.05 were considered as significant and marked in red. An additional table lists the genes which were found as differentially expressed (between SiNET subsets) in all of the cell types. [file elife-101153-supp4.xlsx]

## Sheet: NE
Gene_EPI	log2FC_EPI	p.val_EPI	p.adj_EPI	Gene_NEU	log2FC_NEU	p.val_NEU	p.adj_NEU
TTR	5.6986	0.0357143	0.0968284	UTY	-3.08211	0.0324733	0.0968284
MIF	5.47358	0.0357143	0.0968284	DPH6	-2.59394	0.0357143	0.0968284
S100A6	5.32306	0.0357143	0.0968284	TTC6	-2.59639	0.0357143	0.0968284
PHGR1	5.25587	0.0357143	0.0968284	RAP1GAP2	-2.59674	0.0357143	0.0968284
SERPINA1	5.23884	0.0357143	0.0968284	STXBP5L	-2.61172	0.0357143	0.0968284
HSPA1A	5.19919	0.0357143	0.0968284	RYR2	-2.62682	0.0357143	0.0968284
HSP90AB1	5.18962	0.0357143	0.0968284	TNR	-2.6296	0.0357143	0.0968284
TPT1	5.0445	0.0357143	0.0968284	CROCC	-2.63886	0.0357143	0.0968284
FTL	5.01764	0.0357143	0.0968284	BTBD9	-2.64227	0.0357143	0.0968284
CST3	4.96698	0.0357143	0.0968284	IL1RAPL1	-2.64423	0.0357143	0.0968284
EEF1A1	4.92538	0.0357143	0.0968284	SETBP1	-2.64724	0.0357143	0.0968284
COX8A	4.91421	0.0357143	0.0968284	SMG6	-2.65749	0.0357143	0.0968284
MT2A	4.87584	0.0357143	0.0968284	ZSWIM5	-2.65863	0.0357143	0.0968284
FXYD3	4.85395	0.0357143	0.0968284	PDE10A	-2.67765	0.0357143	0.0968284
GABARAP	4.84523	0.0357143	0.0968284	AHCYL2	-2.69173	0.0357143	0.0968284
BEX1	4.80358	0.0357143	0.0968284	KSR2	-2.69463	0.0357143	0.0968284
TMSB4X	4.77592	0.0357143	0.0968284	FAM155A	-2.71735	0.0357143	0.0968284
HSP90AA1	4.74193	0.0357143	0.0968284	PARD3	-2.71778	0.0357143	0.0968284
FAU	4.71587	0.0357143	0.0968284	TTC7B	-2.72222	0.0357143	0.0968284
PTMA	4.70553	0.0357143	0.0968284	AMBRA1	-2.72713	0.0357143	0.0968284
TAC1	4.70431	0.0357143	0.0968284	RIMS2	-2.72866	0.0357143	0.0968284
DNAJB1	4.69623	0.0357143	0.0968284	DENND1A	-2.73023	0.0357143	0.0968284
S100A10	4.68425	0.0357143	0.0968284	ARMH1	-2.73285	0.0357143	0.0968284
ATP5F1E	4.66559	0.0357143	0.0968284	CASTOR3	-2.737	0.0357143	0.0968284
B2M	4.61143	0.0357143	0.0968284	CTNNA3	-2.73781	0.0357143	0.0968284
TMSB10	4.59486	0.0357143	0.0968284	TTC28	-2.75061	0.0357143	0.0968284
SRP14	4.56152	0.0357143	0.0968284	DNAH12	-2.7524	0.0357143	0.0968284
COX7C	4.51913	0.0357143	0.0968284	SMYD3	-2.77237	0.0357143	0.0968284
UBA52	4.48339	0.0357143	0.0968284	INVS	-2.78088	0.0357143	0.0968284
CKB	4.46848	0.0357143	0.0968284	MIR646HG	-2.78159	0.0357143	0.0968284
ELOB	4.46146	0.0357143	0.0968284	EXOC6B	-2.78273	0.0357143	0.0968284
FTH1	4.45397	0.0357143	0.0968284	FAAH2	-2.79822	0.0357143	0.0968284
UQCRB	4.41489	0.0357143	0.0968284	PARD3B	-2.8013	0.0357143	0.0968284
GAPDH	4.36736	0.0357143	0.0968284	EPCAM-DT	-2.81478	0.0357143	0.0968284
SERF2	4.34977	0.0357143	0.0968284	XYLT1	-2.833	0.0357143	0.0968284
PCSK1N	4.34384	0.0357143	0.0968284	ERC1	-2.84214	0.0357143	0.0968284
H3F3A	4.29756	0.0357143	0.0968284	TTLL6	-2.84545	0.0357143	0.0968284
COX4I1	4.27061	0.0357143	0.0968284	EYA2	-2.85753	0.0357143	0.0968284
HSPB1	4.24616	0.0357143	0.0968284	RFX2	-2.86295	0.0357143	0.0968284
ATP6V0C	4.2165	0.0357143	0.0968284	AGAP1	-2.86499	0.0357143	0.0968284
SSR4	4.1753	0.0357143	0.0968284	PRICKLE1	-2.95733	0.0357143	0.0968284
H3F3B	4.11314	0.0357143	0.0968284	PTPRD	-3.0154	0.0357143	0.0968284
PEBP1	4.0972	0.0357143	0.0968284	SNTG1	-3.03052	0.0357143	0.0968284
HINT1	4.09247	0.0357143	0.0968284	ZMAT4	-3.05974	0.0357143	0.0968284
HLA-A	4.0581	0.0357143	0.0968284	SNED1	-3.06791	0.0357143	0.0968284
EIF1	4.0532	0.0357143	0.0968284	NAALADL2	-3.07937	0.0357143	0.0968284
KRT8	4.05024	0.0357143	0.0968284	CACNA1A	-3.10461	0.0357143	0.0968284
CD59	4.04551	0.0357143	0.0968284	RORA	-3.12786	0.0357143	0.0968284
UBB	4.02601	0.0357143	0.0968284	ATXN7L1	-3.17907	0.0357143	0.0968284
ACTB	3.94209	0.0357143	0.0968284	PRKN	-3.23194	0.0357143	0.0968284
TMA7	3.93918	0.0357143	0.0968284	TYW1B	-3.26515	0.0357143	0.0968284
UQCR11	3.93415	0.0357143	0.0968284	MARCH1	-3.282	0.0357143	0.0968284
TOMM7	3.92459	0.0357143	0.0968284	CECR2	-3.28881	0.0357143	0.0968284
MYL6	3.91484	0.0357143	0.0968284	TRPM3	-3.33622	0.0357143	0.0968284
CD63	3.8685	0.0357143	0.0968284	RABGEF1	-3.35068	0.0357143	0.0968284
CALB1	3.86064	0.0357143	0.0968284	BCAS3	-3.37971	0.0357143	0.0968284
HSPA8	3.84416	0.0357143	0.0968284	GPHN	-3.38379	0.0357143	0.0968284
SELENOK	3.81477	0.0357143	0.0968284	ABLIM2	-3.43866	0.0357143	0.0968284
EID1	3.79437	0.0357143	0.0968284	DPP10	-3.45828	0.0357143	0.0968284
PPIA	3.78613	0.0357143	0.0968284	CACNA1B	-3.54641	0.0357143	0.0968284
TUBA1A	3.78237	0.0357143	0.0968284	MAML3	-3.56511	0.0357143	0.0968284
MT1E	3.77928	0.0357143	0.0968284	WWOX	-3.58831	0.0357143	0.0968284
CFL1	3.77904	0.0357143	0.0968284	KLHL29	-3.59775	0.0357143	0.0968284
ACTG1	3.77472	0.0357143	0.0968284	ASTN2	-3.67142	0.0357143	0.0968284
SCG2	3.75948	0.0357143	0.0968284	MACROD2	-3.67333	0.0357143	0.0968284
NDUFA13	3.73098	0.0357143	0.0968284	KCNIP1	-3.6901	0.0357143	0.0968284
EEF1G	3.72889	0.0357143	0.0968284	PNPLA7	-3.75478	0.0357143	0.0968284
COX6C	3.72577	0.0357143	0.0968284	NAV3	-3.87303	0.0357143	0.0968284
UBC	3.6422	0.0357143	0.0968284	HS6ST3	-3.87977	0.0357143	0.0968284
CALM1	3.63797	0.0357143	0.0968284	RGS7	-3.92329	0.0357143	0.0968284
RACK1	3.6353	0.0357143	0.0968284	DSCAM	-4.2381	0.0357143	0.0968284
TAGLN2	3.58465	0.0357143	0.0968284	KCNB2	-4.8511	0.0357143	0.0968284
RHOB	3.5647	0.0357143	0.0968284	NRG1	-6.01627	0.0357143	0.0968284
TXNIP	3.54866	0.0357143	0.0968284	AGBL4	-4.42412	0.0714286	0.143836
HSP90B1	3.5114	0.0357143	0.0968284	CCSER1	-3.74153	0.142857	0.235495
HSPD1	3.49949	0.0357143	0.0968284	ADARB2	-3.65533	0.25	0.35
HSPA5	3.42581	0.0357143	0.0968284	LSAMP	-3.49165	0.0714286	0.143836
SNHG29	3.41715	0.0357143	0.0968284	SORCS2	-3.47576	0.142857	0.235495
GABARAPL2	3.41011	0.0357143	0.0968284	ASIC2	-3.40025	0.0714286	0.143836
NACA	3.40771	0.0357143	0.0968284	SDK1	-3.27323	0.25	0.35
SKP1	3.4056	0.0357143	0.0968284	SLC39A11	-3.2357	0.0714286	0.143836
BEX3	3.39415	0.0357143	0.0968284	KIRREL3	-3.22984	0.142857	0.235495
SET	3.38894	0.0357143	0.0968284	RBFOX1	-3.22139	0.142857	0.235495
TMBIM6	3.38818	0.0357143	0.0968284	DLG2	-3.17902	0.0714286	0.143836
RNASEK	3.38804	0.0357143	0.0968284	KCNH7	-3.17534	0.0714286	0.143836
HSPH1	3.3878	0.0357143	0.0968284	SEMA6D	-3.13296	0.0714286	0.143836
PFDN5	3.37612	0.0357143	0.0968284	PTPRT	-3.10582	0.25	0.35
EIF4A2	3.35967	0.0357143	0.0968284	CACNA1C	-3.09079	0.0714286	0.143836
CALR	3.33303	0.0357143	0.0968284	IMMP2L	-3.08406	0.142857	0.235495
ATP6V1G1	3.33114	0.0357143	0.0968284	NRXN1	-3.06472	0.0714286	0.143836
JUND	3.30195	0.0357143	0.0968284	PLD5	-3.00137	0.142857	0.235495
OAZ1	3.28426	0.0357143	0.0968284	LRMDA	-2.98592	0.142857	0.235495
GPX4	3.26453	0.0357143	0.0968284	CNTNAP5	-2.98263	0.0714286	0.143836
HNRNPA1	3.24621	0.0357143	0.0968284	CACNB2	-2.97145	0.0714286	0.143836
KCTD12	3.24324	0.0357143	0.0968284	CLEC3A	-2.93295	0.142857	0.235495
ITM2B	3.21799	0.0357143	0.0968284	CSMD1	-2.91954	0.0719241	0.144661
SUMO2	3.17613	0.0357143	0.0968284	KCNMB2	-2.90331	0.0714286	0.143836
SOX4	3.17235	0.0357143	0.0968284	HIVEP3	-2.87954	0.0714286	0.143836
ITM2C	3.14936	0.0357143	0.0968284	GPR39	-2.87345	0.0714286	0.143836
CD164	3.12394	0.0357143	0.0968284	DAB1	-2.85795	0.25	0.35
ATP5MC2	3.08726	0.0357143	0.0968284	DANT2	-2.82833	0.0714286	0.143836
PNRC1	3.08447	0.0357143	0.0968284	RAD51B	-2.81128	0.142857	0.235495
EIF4A1	3.02196	0.0357143	0.0968284	NPAS3	-2.79284	0.142857	0.235495
YWHAB	2.99774	0.0357143	0.0968284	LARGE1	-2.78391	0.0714286	0.143836
ZFP36	2.97536	0.0357143	0.0968284	PTPRN2	-2.75918	0.0714286	0.143836
PSAP	2.96149	0.0357143	0.0968284	PWRN1	-2.73896	0.25	0.35
TMEM59	2.92417	0.0357143	0.0968284	BBS9	-2.72097	0.0714286	0.143836
EPCAM	2.91883	0.0357143	0.0968284	STPG2	-2.71992	0.142857	0.235495
MAT2A	2.89659	0.0357143	0.0968284	LRP1B	-2.7158	0.142857	0.235495
NORAD	2.88635	0.0357143	0.0968284	CTNNA2	-2.6859	0.142857	0.235495
VAMP2	2.85084	0.0357143	0.0968284	DCC	-2.68586	0.142857	0.235495
SARAF	2.84213	0.0357143	0.0968284	SPAG16	-2.68312	0.0714286	0.143836
SERINC1	2.78599	0.0357143	0.0968284	SHISA9	-2.66909	0.142857	0.235495
CALM2	2.76958	0.0357143	0.0968284	NCAM1	-2.6601	0.0714286	0.143836
SELENOP	2.76261	0.0357143	0.0968284	PCED1B	-2.65846	0.0714286	0.143836
TENT5A	2.73755	0.0357143	0.0968284	CTNND2	-2.61681	0.142857	0.235495
HMGN2	2.73458	0.0357143	0.0968284	MCTP1	-2.60577	0.0714286	0.143836
MARCKS	2.73221	0.0357143	0.0968284	FAM135B	-2.60155	0.142857	0.235495
RGS2	2.72435	0.0357143	0.0968284
PABPC1	2.71906	0.0357143	0.0968284
SCG3	2.71406	0.0357143	0.0968284
HNRNPK	2.69875	0.0357143	0.0968284
ARF1	2.69227	0.0357143	0.0968284
SPINT2	2.68008	0.0357143	0.0968284
DNAJA1	2.67346	0.0357143	0.0968284
ST13	2.66878	0.0357143	0.0968284
PDIA3	2.63981	0.0357143	0.0968284
CCNI	2.59088	0.0357143	0.0968284
NPM1	2.58931	0.0357143	0.0968284
NPW	3.85369	0.25	0.35
HSPA1B	3.84799	0.0714286	0.143836
APOD	3.73239	0.142857	0.235495
JUN	3.68344	0.0714286	0.143836
FOSB	3.62627	0.142857	0.235495
IGKC	3.4581	0.142857	0.235495
HLA-B	3.38997	0.0714286	0.143836
ATF3	3.09545	0.0714286	0.143836
EGR1	3.08902	0.142857	0.235495
CD74	2.94306	0.25	0.35
BTG2	2.93531	0.0714286	0.143836
FOS	2.91392	0.142857	0.235495
IGLC3	2.8734	0.133701	0.235495
XIST	2.82808	0.392857	0.493773
NNMT	2.80856	0.0714286	0.143836
PCSK1	2.80516	0.0714286	0.143836
CAMK2N1	2.76677	0.0714286	0.143836
RGS5	2.62442	0.25	0.35

## Sheet: B_cells
Gene_EPI	log2FC_EPI	p.val_EPI	p.adj_EPI	Gene_NEU	log2FC_NEU	p.val_NEU	p.adj_NEU
VPREB3	3.9016	0.049746	0.396652	IL15	-2.65764	0.049746	0.396652
LTB	3.85845	0.049746	0.396652	FAAH2	-2.70993	0.049746	0.396652
FOS	3.67808	0.049746	0.396652	SNED1	-2.76875	0.049746	0.396652
RAC2	3.54134	0.049746	0.396652	FOCAD	-2.9793	0.049746	0.396652
CD79B	3.54023	0.049746	0.396652	LAMC1	-3.34813	0.049746	0.396652
TCL1A	3.47642	0.049746	0.396652	PRKG1	-3.64018	0.049746	0.396652
CNN2	3.19602	0.049746	0.396652	LARGE1	-3.91479	0.049746	0.396652
TNFAIP3	3.18956	0.049746	0.396652	LRP1B	-4.19923	0.049746	0.396652
CHCHD10	3.1592	0.049746	0.396652	BBS9	-3.99386	0.0571429	0.396652
EGR1	3.15831	0.049746	0.396652	IMMP2L	-3.95984	0.228571	0.515119
GAS5	2.84587	0.049746	0.396652	DLG2	-3.90299	0.0571429	0.396652
WAS	2.70134	0.049746	0.396652	WWOX	-3.72281	0.114286	0.415308
ACTB	4.78747	0.0571429	0.396652	NR3C2	-3.71997	0.108408	0.415308
TPT1	4.64538	0.0571429	0.396652	ARL15	-3.6853	0.114286	0.415308
UBA52	4.62748	0.0571429	0.396652	GMDS-DT	-3.61278	0.0571429	0.396652
FAU	4.59258	0.0571429	0.396652	SIK3	-3.58562	0.228571	0.515119
GAPDH	4.58986	0.0571429	0.396652	AUTS2	-3.58096	0.228571	0.515119
MIF	4.5863	0.0571429	0.396652	C22orf34	-3.56839	0.114286	0.415308
PFN1	4.47833	0.0571429	0.396652	VPS13B	-3.54308	0.114286	0.415308
IGKC	4.4351	0.228571	0.515119	NAV2	-3.49267	0.0571429	0.396652
ATP5F1E	4.28284	0.0571429	0.396652	PRKN	-3.48529	0.108408	0.415308
TMSB10	4.2748	0.0571429	0.396652	ANKS1A	-3.45355	0.0571429	0.396652
JCHAIN	4.25486	0.0571429	0.396652	ERC1	-3.45122	0.0571429	0.396652
HMGB2	4.19106	0.0571429	0.396652	FER	-3.44292	0.0571429	0.396652
EEF1B2	4.15924	0.0571429	0.396652	EXOC6B	-3.40601	0.0571429	0.396652
TMSB4X	4.08175	0.0571429	0.396652	EHBP1	-3.39763	0.0571429	0.396652
H2AFZ	4.06317	0.0571429	0.396652	TSHZ2	-3.38338	0.0571429	0.396652
H3F3B	3.98616	0.0571429	0.396652	CAMKMT	-3.38033	0.0571429	0.396652
EEF1G	3.95965	0.0571429	0.396652	PDE4D	-3.36654	0.0571429	0.396652
PTMA	3.93989	0.0571429	0.396652	SMYD3	-3.33299	0.0571429	0.396652
PRDX1	3.87246	0.0571429	0.396652	TRAPPC9	-3.31854	0.0571429	0.396652
BTG1	3.75391	0.0571429	0.396652	TMEM117	-3.29093	0.0571429	0.396652
SH3BGRL3	3.71153	0.0571429	0.396652	BCAS3	-3.28856	0.0571429	0.396652
ATP5MG	3.68277	0.0571429	0.396652	EXOC4	-3.2872	0.0571429	0.396652
HMGN2	3.66058	0.0571429	0.396652	RFX3	-3.28023	0.228571	0.515119
EEF1A1	3.65613	0.0571429	0.396652	SAMD12	-3.27947	0.0571429	0.396652
SET	3.65456	0.0571429	0.396652	TRIO	-3.26563	0.228571	0.515119
BTF3	3.6423	0.0571429	0.396652	CEP128	-3.24469	0.0571429	0.396652
SNRPD2	3.60603	0.0571429	0.396652	PEAK1	-3.23436	0.114286	0.415308
NME2	3.59975	0.0571429	0.396652	MYO1D	-3.23079	0.114286	0.415308
RAN	3.55478	0.0571429	0.396652	LRMDA	-3.22055	0.19909	0.515119
H3F3A	3.55099	0.0571429	0.396652	FARS2	-3.2169	0.114286	0.415308
PSMA7	3.5401	0.0571429	0.396652	NBEA	-3.18057	0.0571429	0.396652
CHCHD2	3.53222	0.0571429	0.396652	NBAS	-3.18026	0.0571429	0.396652
COX6A1	3.50932	0.0571429	0.396652	ELMO1	-3.17899	0.228571	0.515119
TPI1	3.49114	0.0571429	0.396652	KIAA1328	-3.1695	0.0571429	0.396652
CACYBP	3.48247	0.0571429	0.396652	ST6GALNAC3	-3.15893	0.372456	0.632666
MARCKSL1	3.45815	0.114286	0.415308	CTNNA1	-3.15467	0.0571429	0.396652
HIST1H4C	3.4526	0.228571	0.515119	L3MBTL4	-3.14609	0.228571	0.515119
FTH1	3.44422	0.0571429	0.396652	PTPRK	-3.13786	0.228571	0.515119
SUMO2	3.43627	0.0571429	0.396652	AHCYL2	-3.13191	0.114286	0.415308
UQCRB	3.42438	0.0571429	0.396652	DPH6	-3.12652	0.0571429	0.396652
SRGN	3.40357	0.0571429	0.396652	FBXL17	-3.11941	0.228571	0.515119
SNHG29	3.38367	0.0571429	0.396652	CCSER1	-3.09921	0.228571	0.515119
IGLC1	3.36778	0.108408	0.415308	PCCA	-3.09915	0.0571429	0.396652
COX6C	3.36496	0.0571429	0.396652	SPIDR	-3.09141	0.0571429	0.396652
COX7C	3.35569	0.0571429	0.396652	AKT3	-3.08659	0.114286	0.415308
NDUFA4	3.35319	0.0571429	0.396652	DYM	-3.08597	0.114286	0.415308
CFL1	3.34197	0.0571429	0.396652	DENND1A	-3.0673	0.4	0.632666
UBB	3.33268	0.0571429	0.396652	ZNF407	-3.06548	0.114286	0.415308
DYNLL1	3.29689	0.0571429	0.396652	AOPEP	-3.0586	0.0571429	0.396652
HSP90AB1	3.29035	0.0571429	0.396652	ZBTB20	-3.05107	0.0571429	0.396652
PPIA	3.25498	0.0571429	0.396652	FHIT	-3.02384	0.4	0.632666
ACTG1	3.24838	0.0571429	0.396652	SBF2	-3.02026	0.114286	0.415308
RACK1	3.23832	0.0571429	0.396652	CDKAL1	-3.01531	0.0571429	0.396652
MYL12B	3.21688	0.0571429	0.396652	MAML2	-3.00174	0.4	0.632666
OST4	3.20141	0.0571429	0.396652	FAF1	-2.99694	0.0571429	0.396652
MYL6	3.20039	0.114286	0.415308	MAPK8	-2.99637	0.0571429	0.396652
GNG5	3.17985	0.0571429	0.396652	TBC1D9	-2.97985	0.114286	0.415308
EIF5A	3.17859	0.0571429	0.396652	VAV3	-2.97928	0.228571	0.515119
TUBA1B	3.17844	0.0571429	0.396652	FUT8	-2.95124	0.114286	0.415308
CD79A	3.17714	0.0571429	0.396652	CRADD	-2.95045	0.0571429	0.396652
MT2A	3.1581	0.0571429	0.396652	UTRN	-2.95036	0.228571	0.515119
TMA7	3.15766	0.114286	0.415308	ARHGAP26	-2.94868	0.228571	0.515119
ATP5MC2	3.13845	0.0571429	0.396652	SCMH1	-2.94152	0.0571429	0.396652
HLA-DRA	3.11501	0.0571429	0.396652	GPHN	-2.93391	0.0571429	0.396652
ATP5F1D	3.10996	0.0571429	0.396652	IGF1R	-2.93076	0.114286	0.415308
ATP5MC3	3.10882	0.0571429	0.396652	FTX	-2.93074	0.114286	0.415308
PPDPF	3.10052	0.0571429	0.396652	CHGA	-2.92705	0.0571429	0.396652
IGHM	3.09718	0.0571429	0.396652	CDK17	-2.92483	0.0571429	0.396652
COX5B	3.09696	0.0571429	0.396652	SUPT3H	-2.92128	0.114286	0.415308
DUT	3.09382	0.0571429	0.396652	GRK5	-2.91642	0.114286	0.415308
EIF1	3.07952	0.0571429	0.396652	PELI2	-2.91466	0.211798	0.515119
S100A10	3.06952	0.114286	0.415308	AFDN	-2.91272	0.0571429	0.396652
NDUFA13	3.06655	0.0571429	0.396652	OSBPL10	-2.91172	0.228571	0.515119
NDUFA11	3.05243	0.0571429	0.396652	EPB41L4A	-2.90598	0.0571429	0.396652
SLC25A6	3.02834	0.0571429	0.396652	PDSS2	-2.90027	0.0571429	0.396652
CLIC1	3.02093	0.0571429	0.396652	SCAPER	-2.89773	0.0571429	0.396652
JUNB	2.98921	0.0571429	0.396652	KDM4C	-2.88997	0.228571	0.515119
ATP6V1G1	2.97912	0.0571429	0.396652	PRH1	-2.88514	0.0571429	0.396652
TUBB	2.95836	0.0571429	0.396652	MGAT5	-2.88494	0.228571	0.515119
COX4I1	2.93443	0.0571429	0.396652	RAD51B	-2.88094	0.228571	0.515119
CALR	2.92523	0.0571429	0.396652	KLF12	-2.86277	0.228571	0.515119
GSTP1	2.91922	0.0571429	0.396652	UBR3	-2.85924	0.0571429	0.396652
CORO1A	2.91573	0.0571429	0.396652	ZEB1	-2.85661	0.0571429	0.396652
IL7R	2.89128	0.108408	0.415308	NCOA1	-2.84764	0.0571429	0.396652
BIRC3	2.8866	0.0571429	0.396652	FAM172A	-2.83234	0.228571	0.515119
NPM1	2.88653	0.0571429	0.396652	MACROD2	-2.80513	0.0571429	0.396652
HSPD1	2.88436	0.114286	0.415308	UBE3D	-2.79918	0.0571429	0.396652
FTL	2.86885	0.0571429	0.396652	CASK	-2.78477	0.114286	0.415308
ANP32B	2.86186	0.0571429	0.396652	SCFD2	-2.78248	0.4	0.632666
SERF2	2.85662	0.0571429	0.396652	TVP23C	-2.77936	0.0571429	0.396652
GABARAP	2.83678	0.0571429	0.396652	ETV6	-2.77746	0.228571	0.515119
ARHGDIB	2.82822	0.0571429	0.396652	CHST15	-2.77559	0.228571	0.515119
IGLC3	2.80512	0.211798	0.515119	DPYD	-2.76325	0.628571	0.788543
JUND	2.78089	0.0571429	0.396652	COP1	-2.76235	0.114286	0.415308
YWHAB	2.77114	0.114286	0.415308	AUH	-2.75911	0.108408	0.415308
PSME1	2.76789	0.0571429	0.396652	DIS3L2	-2.75784	0.114286	0.415308
NACA	2.76217	0.0571429	0.396652	SFMBT2	-2.75633	0.114286	0.415308
DNAJB1	2.76062	0.4	0.632666	FAM120B	-2.75407	0.228571	0.515119
ZFP36L2	2.75987	0.0571429	0.396652	DENND5B	-2.74861	0.114286	0.415308
CRIP1	2.75624	0.228571	0.515119	CCNY	-2.7404	0.228571	0.515119
HMGB1	2.7551	0.114286	0.415308	CDK14	-2.7352	0.114286	0.415308
SSR4	2.75163	0.0571429	0.396652	COMMD10	-2.72155	0.228571	0.515119
GMFG	2.73521	0.0571429	0.396652	ZFAND3	-2.70711	0.228571	0.515119
SRP14	2.72576	0.0571429	0.396652	RALGAPA2	-2.6955	0.228571	0.515119
ENO1	2.71892	0.0571429	0.396652	MED13L	-2.68984	0.0571429	0.396652
PARK7	2.70076	0.0571429	0.396652	ZDHHC14	-2.68229	0.4	0.632666
ITGAE	2.69769	0.0571429	0.396652	ABL1	-2.67799	0.114286	0.415308
EEF2	2.68616	0.0571429	0.396652	WDR7	-2.67361	0.0571429	0.396652
HSP90AA1	2.68464	0.228571	0.515119	FCHSD2	-2.65901	0.114286	0.415308
ARPC5	2.67872	0.0571429	0.396652	ATXN1	-2.65011	0.0571429	0.396652
IER2	2.66609	0.0571429	0.396652	GALK2	-2.64965	0.0571429	0.396652
LSM7	2.66443	0.0571429	0.396652	PDE8A	-2.64109	0.0571429	0.396652
H2AFV	2.65975	0.0571429	0.396652	CCDC7	-2.63561	0.0571429	0.396652
EIF3F	2.64686	0.0571429	0.396652	MTSS1	-2.63224	0.628571	0.788543
CD52	2.6348	0.0571429	0.396652	STAG1	-2.62562	0.0571429	0.396652
SNU13	2.63407	0.0571429	0.396652	BICD1	-2.61465	0.114286	0.415308
EIF1AX	2.63222	0.0571429	0.396652	GAB1	-2.61072	0.228571	0.515119
SERP1	2.62963	0.114286	0.415308	ASAP1	-2.60682	0.0571429	0.396652
UQCRH	2.61766	0.0571429	0.396652	DCC	-2.59679	0.19909	0.515119
TOMM7	2.61397	0.0571429	0.396652	RAPGEF4	-2.59133	0.284503	0.632666
HSPB1	2.61018	0.228571	0.515119	ANTXR2	-2.59132	0.114286	0.415308
SRSF3	2.60393	0.0571429	0.396652	LRBA	-2.58786	0.114286	0.415308
CBX3	2.59972	0.0571429	0.396652	DIAPH2	-2.58644	0.114286	0.415308
HSPE1	2.59296	0.4	0.632666
MYL12A	2.59052	0.0571429	0.396652
CXCR4	2.59032	0.0571429	0.396652

## Sheet: T_cells
Gene_EPI	log2FC_EPI	p.val_EPI	p.adj_EPI	Gene_NEU	log2FC_NEU	p.val_NEU	p.adj_NEU
MT2A	4.1775	0.171371	0.535105	DOCK10	-3.49679	0.380952	0.68556
GAPDH	4.08047	0.0952381	0.535105	SAMD3	-3.46568	0.0952381	0.535105
FTH1	3.99331	0.0952381	0.535105	ANK3	-3.43571	0.380952	0.68556
CXCL13	3.98487	0.171371	0.535105	PARP8	-3.40999	0.190476	0.535105
TPT1	3.96986	0.0952381	0.535105	DPYD	-3.33869	0.0952381	0.535105
MIF	3.90176	0.0952381	0.535105	C22orf34	-3.31699	0.0952381	0.535105
ACTB	3.88374	0.0952381	0.535105	SLFN12L	-3.30147	0.190476	0.535105
COX6A1	3.87812	0.0786429	0.535105	IMMP2L	-3.25847	0.380952	0.68556
IGHM	3.82059	0.0786429	0.535105	PLCL2	-3.21879	0.0952381	0.535105
MYL6	3.81185	0.0952381	0.535105	NELL2	-3.21209	0.190476	0.535105
NME2	3.78432	0.0786429	0.535105	DYRK1A	-3.17405	0.0952381	0.535105
ATP5F1E	3.77004	0.0952381	0.535105	RASA3	-3.1724	0.190476	0.535105
PTMA	3.71882	0.0952381	0.535105	TRERF1	-3.12375	0.0952381	0.535105
SERF2	3.70426	0.0952381	0.535105	FARS2	-3.09103	0.190476	0.535105
TPI1	3.6518	0.070508	0.535105	ARHGAP15	-3.08347	0.380952	0.68556
BTF3	3.64732	0.0786429	0.535105	KDM4C	-3.04432	0.190476	0.535105
IFITM2	3.5679	0.0786429	0.535105	ADK	-3.03849	0.190476	0.535105
IGKC	3.5463	0.328565	0.68556	PCNX2	-3.03702	0.0952381	0.535105
PPIB	3.49645	0.0786429	0.535105	HEATR5B	-3.03072	0.0952381	0.535105
FAU	3.48701	0.0952381	0.535105	ZNF407	-3.01707	0.190476	0.535105
COX7C	3.48227	0.171371	0.535105	MPP7	-2.99684	0.0952381	0.535105
S100A4	3.47475	0.159512	0.535105	FOXN3	-2.99189	0.0952381	0.535105
UBA52	3.4166	0.0952381	0.535105	NLRC5	-2.95372	0.0952381	0.535105
CALR	3.41604	0.0952381	0.535105	ATG7	-2.93602	0.0952381	0.535105
EEF1B2	3.41079	0.0952381	0.535105	RFX3	-2.9221	0.380952	0.68556
CRIP1	3.37372	0.190476	0.535105	CHGA	-2.9119	0.190476	0.535105
SNHG29	3.32578	0.0952381	0.535105	CAMKMT	-2.90844	0.190476	0.535105
ACTG1	3.3162	0.0952381	0.535105	ELMO1	-2.90153	0.190476	0.535105
EIF1	3.29119	0.0952381	0.535105	ANTXR2	-2.885	0.0952381	0.535105
CLIC1	3.24335	0.0952381	0.535105	GPHN	-2.88338	0.0952381	0.535105
SH3BGRL3	3.19208	0.0952381	0.535105	ATP9B	-2.87702	0.0952381	0.535105
FTL	3.1326	0.0952381	0.535105	XYLT1	-2.8654	0.190476	0.535105
TMSB10	3.11774	0.0952381	0.535105	PIK3R5	-2.86152	0.571429	0.775169
COX4I1	3.05015	0.0952381	0.535105	MGAT5	-2.84046	0.571429	0.775169
OST4	3.02718	0.0952381	0.535105	PATJ	-2.83411	0.190476	0.535105
SUMO2	3.0259	0.0952381	0.535105	SORL1	-2.83171	0.380952	0.68556
ATP5MG	3.02069	0.0952381	0.535105	WWOX	-2.81452	0.190476	0.535105
EEF1A1	3.00371	0.0952381	0.535105	EXT1	-2.81436	0.190476	0.535105
S100A11	3.00335	0.0786429	0.535105	GALNT10	-2.8023	0.0952381	0.535105
IFITM3	2.99926	0.0786429	0.535105	WDPCP	-2.78892	0.0952381	0.535105
HSPA5	2.97176	0.0786429	0.535105	STX8	-2.78774	0.0952381	0.535105
APRT	2.94238	0.0786429	0.535105	ZNF609	-2.77204	0.380952	0.68556
SEC61B	2.9422	0.0952381	0.535105	SLC39A11	-2.75015	0.190476	0.535105
GSTP1	2.92419	0.0952381	0.535105	SBF2	-2.73024	0.0952381	0.535105
ATP5MC3	2.92303	0.0952381	0.535105	SCFD2	-2.72499	0.380952	0.68556
H2AFZ	2.86488	0.0952381	0.535105	CSGALNACT1	-2.72298	0.380952	0.68556
EEF1G	2.86325	0.0952381	0.535105	ATP10A	-2.71893	0.190476	0.535105
TMSB4X	2.85357	0.0952381	0.535105	SETBP1	-2.71354	0.0952381	0.535105
PPDPF	2.84933	0.0952381	0.535105	AKT3	-2.71123	0.0952381	0.535105
CFL1	2.81562	0.0952381	0.535105	TRAPPC9	-2.70593	0.190476	0.535105
PFN1	2.81449	0.0952381	0.535105	CAMK1D	-2.69499	0.0952381	0.535105
CORO1B	2.80782	0.0952381	0.535105	RPTOR	-2.68396	0.190476	0.535105
SRP14	2.80253	0.0952381	0.535105	RFTN1	-2.67997	0.380952	0.68556
ATP6V1G1	2.79146	0.0786429	0.535105	JAZF1	-2.66743	0.0952381	0.535105
ARF6	2.72695	0.0952381	0.535105	RAD51B	-2.65604	0.857143	0.929071
NACA	2.72692	0.0952381	0.535105	PTK2B	-2.65416	0.190476	0.535105
XIST	2.72559	0.845078	0.929071	GNLY	-2.64298	0.241032	0.670789
GABARAP	2.69852	0.0952381	0.535105	PTBP2	-2.64216	0.0952381	0.535105
RAN	2.68718	0.0952381	0.535105	ARHGEF18	-2.64161	0.190476	0.535105
RACK1	2.67574	0.0952381	0.535105	KLRG1	-2.63705	0.0952381	0.535105
FOS	2.66629	0.0786429	0.535105	PDE3B	-2.6236	0.571429	0.775169
SOCS1	2.66398	0.171371	0.535105	SMG6	-2.62193	0.190476	0.535105
SOCS3	2.63631	0.0786429	0.535105	ARHGAP26	-2.61998	0.0952381	0.535105
PPIA	2.62697	0.0952381	0.535105	GPATCH8	-2.61747	0.190476	0.535105
COX5B	2.62433	0.0952381	0.535105	STK39	-2.61656	0.190476	0.535105
ATP5MC2	2.61393	0.0952381	0.535105	SLC9A9	-2.61428	0.571429	0.775169
SLC25A6	2.61315	0.0952381	0.535105	PRKAG2	-2.61326	0.190476	0.535105
BZW1	2.61002	0.0786429	0.535105	PBX3	-2.59916	0.190476	0.535105
PSME1	2.60431	0.190476	0.535105	EXOC6B	-2.59152	0.0952381	0.535105
				UBR3	-2.58778	0.0952381	0.535105

## Sheet: Macrophage
Gene_EPI	log2FC_EPI	p.val_EPI	p.adj_EPI	Gene_NEU	log2FC_NEU	p.val_NEU	p.adj_NEU
G0S2	4.77372	0.0435966	0.302715	INVS	-3.27038	0.049746	0.302715
S100A9	4.19796	0.0435966	0.302715	CCSER1	-5.1058	0.0571429	0.302715
HES1	3.57911	0.0435966	0.302715	HDAC9	-4.64415	0.0571429	0.302715
EGR1	5.27728	0.049746	0.302715	ARHGAP24	-4.51425	0.0571429	0.302715
CCL4	5.19204	0.049746	0.302715	ATG7	-4.48428	0.0571429	0.302715
CFL1	4.41885	0.049746	0.302715	LRMDA	-4.46627	0.0571429	0.302715
IL10	4.37257	0.049746	0.302715	IMMP2L	-4.45039	0.0571429	0.302715
NME2	4.12649	0.049746	0.302715	FHIT	-4.38226	0.114286	0.32526
APOE	4.1177	0.049746	0.302715	TBC1D5	-4.29788	0.0571429	0.302715
IER5	4.11419	0.049746	0.302715	C22orf34	-4.2411	0.0571429	0.302715
LGALS1	4.04158	0.049746	0.302715	WWOX	-4.11043	0.114286	0.32526
S100A8	3.76512	0.049746	0.302715	DTNA	-4.04603	0.0571429	0.302715
BTF3	3.6432	0.049746	0.302715	NAV2	-3.95435	0.0571429	0.302715
CXCL3	3.54635	0.049746	0.302715	GAS7	-3.88168	0.0571429	0.302715
TPI1	3.50347	0.049746	0.302715	PLXDC2	-3.86522	0.0571429	0.302715
TNF	3.45602	0.049746	0.302715	CAMKMT	-3.78162	0.0571429	0.302715
TMBIM6	3.3583	0.049746	0.302715	TCF12	-3.77592	0.228571	0.449868
TUBA1B	3.33257	0.049746	0.302715	MS4A4E	-3.68756	0.211798	0.449868
IGSF6	3.20246	0.049746	0.302715	CAMK1D	-3.67189	0.0571429	0.302715
EHD1	3.10975	0.049746	0.302715	TPK1	-3.64733	0.0571429	0.302715
FPR1	3.09513	0.049746	0.302715	CPED1	-3.63528	0.0571429	0.302715
PIM1	2.91695	0.049746	0.302715	RFX3	-3.6063	0.0571429	0.302715
TAF10	2.90906	0.049746	0.302715	ZNF804A	-3.59895	0.0571429	0.302715
PRELID1	2.87078	0.049746	0.302715	SSBP2	-3.57763	0.0571429	0.302715
CD48	2.81027	0.049746	0.302715	MAML3	-3.5411	0.0571429	0.302715
RAC2	2.71491	0.049746	0.302715	SCFD2	-3.52555	0.114286	0.32526
PIM3	2.71011	0.049746	0.302715	ADAM28	-3.50925	0.0571429	0.302715
IL1B	5.3934	0.0571429	0.302715	FAM172A	-3.4842	0.211798	0.449868
TMSB10	5.05127	0.0571429	0.302715	ZNF710	-3.46792	0.0571429	0.302715
FAU	4.69899	0.0571429	0.302715	NCOA2	-3.46587	0.0571429	0.302715
CXCL8	4.63887	0.228571	0.449868	SND1	-3.45752	0.114286	0.32526
FTL	4.43488	0.0571429	0.302715	AUTS2	-3.45275	0.0571429	0.302715
UBA52	4.42089	0.0571429	0.302715	FER	-3.43718	0.0571429	0.302715
BAG3	4.21834	0.108408	0.32526	CHST11	-3.4342	0.228571	0.449868
S100A10	4.18112	0.108408	0.32526	TRIO	-3.42854	0.0571429	0.302715
CCL3	4.17971	0.0571429	0.302715	CDKAL1	-3.42202	0.0571429	0.302715
DNAJB1	4.14822	0.114286	0.32526	SBF2	-3.41686	0.628571	0.749569
ATP5F1E	4.13598	0.114286	0.32526	SLC9A9	-3.41042	0.4	0.588918
ACTB	4.07343	0.0571429	0.302715	C20orf194	-3.40996	0.0571429	0.302715
MIF	4.00672	0.0571429	0.302715	PEAK1	-3.39906	0.114286	0.32526
SH3BGRL3	4.00095	0.0571429	0.302715	BABAM2	-3.39775	0.0571429	0.302715
HSP90AA1	3.99202	0.114286	0.32526	FCHSD2	-3.38821	0.0571429	0.302715
MT2A	3.97419	0.0571429	0.302715	BTBD9	-3.38399	0.114286	0.32526
UBB	3.95283	0.108408	0.32526	DUSP16	-3.37401	0.0571429	0.302715
RACK1	3.93834	0.0571429	0.302715	ERC1	-3.37038	0.0571429	0.302715
S100A11	3.86115	0.0571429	0.302715	IQGAP2	-3.36605	0.114286	0.32526
CST3	3.85425	0.0571429	0.302715	DOCK4	-3.36605	0.114286	0.32526
HSPA8	3.84303	0.0571429	0.302715	DAPK1	-3.35874	0.4	0.588918
CALR	3.79397	0.0571429	0.302715	MAML2	-3.34062	0.0571429	0.302715
HSPB1	3.77751	0.108408	0.32526	FAF1	-3.34029	0.114286	0.32526
HSPA1A	3.77084	0.114286	0.32526	CIITA	-3.30532	0.0571429	0.302715
TMSB4X	3.71136	0.0571429	0.302715	DHRSX	-3.30242	0.0571429	0.302715
FCER1G	3.6883	0.0571429	0.302715	STAG1	-3.2978	0.0571429	0.302715
TPT1	3.68575	0.0571429	0.302715	PDGFC	-3.2819	0.228571	0.449868
FABP5	3.68141	0.0571429	0.302715	CDK14	-3.27545	0.0571429	0.302715
C15orf48	3.67931	0.211798	0.449868	PRKN	-3.27339	0.108408	0.32526
H3F3A	3.5909	0.0571429	0.302715	VPS8	-3.27131	0.228571	0.449868
LYZ	3.57406	0.628571	0.749569	RTN1	-3.24447	0.0571429	0.302715
PFN1	3.56346	0.0571429	0.302715	GMDS	-3.24411	0.0571429	0.302715
CSTB	3.54464	0.211798	0.449868	KDM4C	-3.23995	0.0571429	0.302715
KLF2	3.43451	0.114286	0.32526	SUMF1	-3.23819	0.114286	0.32526
GAPDH	3.42493	0.0571429	0.302715	ELMO1	-3.23684	0.0571429	0.302715
S100A6	3.42128	0.228571	0.449868	MBP	-3.22392	0.0571429	0.302715
FTH1	3.41511	0.114286	0.32526	SMYD3	-3.22089	0.228571	0.449868
ATP6V0C	3.4059	0.0571429	0.302715	PARP8	-3.21918	0.0571429	0.302715
ATP5MC2	3.39501	0.0571429	0.302715	ENTPD1	-3.21297	0.0571429	0.302715
EEF1B2	3.36583	0.0571429	0.302715	SNX29	-3.20793	0.0571429	0.302715
SOCS3	3.35181	0.0571429	0.302715	DISC1	-3.20662	0.0571429	0.302715
TIMP1	3.33284	0.0571429	0.302715	AHCYL2	-3.19145	0.0571429	0.302715
NPC2	3.32995	0.0571429	0.302715	GAB2	-3.18495	0.228571	0.449868
MYL12A	3.27874	0.0571429	0.302715	TRAPPC9	-3.18275	0.0571429	0.302715
AIF1	3.27613	0.0571429	0.302715	NEK6	-3.17552	0.114286	0.32526
EREG	3.26865	0.211798	0.449868	AFF3	-3.16771	0.228571	0.449868
AREG	3.25303	0.228571	0.449868	CSF2RA	-3.16539	0.0571429	0.302715
NACA	3.25065	0.114286	0.32526	HMBOX1	-3.15257	0.0571429	0.302715
EIF1	3.23205	0.0571429	0.302715	TMCC1	-3.14742	0.114286	0.32526
GSTP1	3.22104	0.114286	0.32526	ARHGAP15	-3.14641	0.4	0.588918
ATP5MG	3.22025	0.0571429	0.302715	XYLT1	-3.13849	0.0571429	0.302715
H3F3B	3.18227	0.0571429	0.302715	LDLRAD4	-3.13301	0.0571429	0.302715
CD63	3.17609	0.0571429	0.302715	ZNRF2	-3.13041	0.0571429	0.302715
HSPA5	3.16678	0.0571429	0.302715	STX7	-3.12577	0.0571429	0.302715
SOD2	3.14229	0.0571429	0.302715	CLEC2D	-3.12136	0.0571429	0.302715
HBEGF	3.13539	0.0571429	0.302715	STARD13	-3.12055	0.284503	0.552595
PTMA	3.13038	0.0571429	0.302715	OSBPL1A	-3.11732	0.0571429	0.302715
C1QA	3.08284	0.0571429	0.302715	PLCB1	-3.11195	0.0571429	0.302715
HSPD1	3.06033	0.114286	0.32526	PPM1L	-3.10718	0.114286	0.32526
ZFAND2A	3.05501	0.114286	0.32526	RERE	-3.09904	0.0571429	0.302715
MYL6	3.05402	0.0571429	0.302715	GNA12	-3.09826	0.0571429	0.302715
CALM1	3.04631	0.0571429	0.302715	PLCL2	-3.09217	0.4	0.588918
EEF1A1	3.04203	0.0571429	0.302715	TPCN1	-3.09149	0.114286	0.32526
ICAM1	3.01037	0.0571429	0.302715	DOCK8	-3.09087	0.0571429	0.302715
IER2	2.99106	0.0571429	0.302715	LRCH1	-3.07554	0.0571429	0.302715
CEBPB	2.98813	0.0571429	0.302715	ARHGEF10L	-3.0748	0.0571429	0.302715
ACTG1	2.98698	0.0571429	0.302715	ANK3	-3.06896	0.114286	0.32526
HSPA1B	2.97893	0.4	0.588918	KCNQ1	-3.06772	0.0571429	0.302715
CACYBP	2.97533	0.228571	0.449868	RFX7	-3.06704	0.0571429	0.302715
C1QB	2.96673	0.0571429	0.302715	RUNX1	-3.06693	0.114286	0.32526
DUSP6	2.94562	0.0571429	0.302715	PIAS1	-3.05057	0.114286	0.32526
SERPINA1	2.93175	0.0571429	0.302715	SPIDR	-3.04918	0.228571	0.449868
BTG1	2.93105	0.4	0.588918	FRMD4A	-3.04855	0.628571	0.749569
COX4I1	2.92288	0.0571429	0.302715	UVRAG	-3.04621	0.0571429	0.302715
MAFB	2.90992	0.0571429	0.302715	KIF16B	-3.04214	0.0571429	0.302715
JUN	2.89492	0.4	0.588918	FAM135A	-3.03926	0.0571429	0.302715
HSP90AB1	2.89204	0.114286	0.32526	DLEU2	-3.03898	0.4	0.588918
EEF1G	2.8834	0.0571429	0.302715	PSD3	-3.03689	0.59256	0.749569
SET	2.87764	0.0571429	0.302715	CLASP1	-3.03656	0.228571	0.449868
BASP1	2.85626	0.114286	0.32526	GALNT10	-3.03548	0.114286	0.32526
PTGS2	2.84483	0.114286	0.32526	FOXN3	-3.03007	0.0571429	0.302715
RHOG	2.84216	0.0571429	0.302715	FMN1	-3.02855	0.4	0.588918
IFITM3	2.83946	0.0571429	0.302715	L3MBTL4	-3.02325	0.114286	0.32526
HINT1	2.83779	0.0571429	0.302715	ARHGAP10	-3.01923	0.114286	0.32526
FOSB	2.83365	0.228571	0.449868	MTSS1	-3.01681	0.4	0.588918
RHOB	2.81853	0.0571429	0.302715	MAPK8	-3.01473	0.0571429	0.302715
CTSL	2.81692	0.211798	0.449868	PRKAG2	-3.00312	0.0571429	0.302715
GPX4	2.80757	0.114286	0.32526	DENND4A	-3.00126	0.0571429	0.302715
PSMA7	2.80043	0.114286	0.32526	ARHGAP26	-2.99659	0.114286	0.32526
GNG5	2.79673	0.0571429	0.302715	SLC39A11	-2.98717	0.0571429	0.302715
ARPC4	2.79646	0.0571429	0.302715	MBNL2	-2.98318	0.0571429	0.302715
CXCL2	2.77249	0.372456	0.588918	CASK	-2.98259	0.0571429	0.302715
EEF2	2.76806	0.0571429	0.302715	OSBPL3	-2.98205	0.0571429	0.302715
MMP19	2.75727	0.359012	0.588918	MICAL2	-2.97984	0.0571429	0.302715
PCBP1	2.74361	0.114286	0.32526	RIC1	-2.97938	0.114286	0.32526
MARCKS	2.73734	0.228571	0.449868	LYPLAL1	-2.97568	0.0571429	0.302715
CHCHD2	2.73503	0.114286	0.32526	ATP9B	-2.97565	0.114286	0.32526
EMP3	2.7343	0.228571	0.449868	ETV6	-2.97538	0.114286	0.32526
CLIC1	2.72321	0.0571429	0.302715	VTI1A	-2.97082	0.114286	0.32526
PTGDS	2.71247	0.372456	0.588918	UBE2E2	-2.97038	0.114286	0.32526
B2M	2.70859	0.114286	0.32526	FAM53B	-2.94801	0.228571	0.449868
BCL2A1	2.70715	0.114286	0.32526	NBAS	-2.94423	0.0571429	0.302715
PPIB	2.6999	0.0571429	0.302715	HDAC8	-2.94311	0.0571429	0.302715
SEC61B	2.69903	0.0571429	0.302715	NCKAP5	-2.93383	0.0571429	0.302715
RNASEK	2.69123	0.114286	0.32526	DPYD	-2.93364	0.4	0.588918
CTSD	2.68743	0.0571429	0.302715	SYNE1	-2.92932	0.0571429	0.302715
ARL6IP1	2.66962	0.0571429	0.302715	TFEC	-2.92762	0.0571429	0.302715
SRSF3	2.66905	0.114286	0.32526	DISP1	-2.92548	0.108408	0.32526
NPM1	2.64394	0.0571429	0.302715	TMTC2	-2.92491	0.0571429	0.302715
DUSP2	2.63325	0.228571	0.449868	PPP1R12B	-2.92102	0.228571	0.449868
ID2	2.61566	0.114286	0.32526	MVB12B	-2.91811	0.628571	0.749569
DNAJA1	2.61475	0.228571	0.449868	GMDS-DT	-2.91622	0.228571	0.449868
ADM	2.61192	0.359012	0.588918	ARHGAP22	-2.91128	0.0571429	0.302715
				PTPRM	-2.90667	0.228571	0.449868
				ZBTB20	-2.90458	0.0571429	0.302715
				HTT	-2.90373	0.114286	0.32526
				PELI2	-2.90307	0.0571429	0.302715
				BMP2K	-2.89973	0.114286	0.32526
				MGAT5	-2.89808	0.4	0.588918
				CDYL	-2.89667	0.0571429	0.302715
				WDR7	-2.8921	0.0571429	0.302715
				JAK2	-2.88501	0.114286	0.32526
				UMAD1	-2.88495	0.108408	0.32526
				MYO5A	-2.88039	0.114286	0.32526
				MOB3B	-2.87722	0.0571429	0.302715
				HDAC4	-2.87537	0.228571	0.449868
				ARHGAP6	-2.87536	0.284503	0.552595
				EXOC6B	-2.87185	0.114286	0.32526
				MAP2K5	-2.86656	0.228571	0.449868
				RAD51B	-2.86554	0.228571	0.449868
				EXOC4	-2.86204	0.114286	0.32526
				TBC1D22A	-2.85741	0.0571429	0.302715
				VAV3	-2.84745	0.0571429	0.302715
				ANKRD44	-2.84741	0.0571429	0.302715
				ATP8B4	-2.84718	0.114286	0.32526
				UBR2	-2.84325	0.0571429	0.302715
				SGMS1	-2.84292	0.228571	0.449868
				KAT6B	-2.83489	0.0571429	0.302715
				ADK	-2.83361	0.0571429	0.302715
				MYO1E	-2.82879	0.114286	0.32526
				EHMT1	-2.82696	0.0571429	0.302715
				SUPT3H	-2.82412	0.0571429	0.302715
				PCCA	-2.81867	0.628571	0.749569
				DIAPH2	-2.81699	0.228571	0.449868
				CCDC26	-2.81629	0.228571	0.449868
				CUX1	-2.8129	0.0571429	0.302715
				UST	-2.80399	0.211798	0.449868
				PLEKHM3	-2.8009	0.0571429	0.302715
				ASAP1	-2.79987	0.114286	0.32526
				SIK3	-2.79913	0.0571429	0.302715
				GLCCI1	-2.79755	0.108408	0.32526
				SFMBT2	-2.79743	0.228571	0.449868
				SIPA1L3	-2.79548	0.0571429	0.302715
				GBF1	-2.79474	0.0571429	0.302715
				PIP5K1A	-2.79033	0.0571429	0.302715
				NCOA1	-2.78483	0.0571429	0.302715
				KMT2C	-2.78213	0.0571429	0.302715
				ZFAND3	-2.77887	0.114286	0.32526
				SRGAP3	-2.77526	0.114286	0.32526
				UBE3C	-2.77167	0.114286	0.32526
				NUBPL	-2.76947	0.0571429	0.302715
				ARHGAP25	-2.76662	0.628571	0.749569
				GRK5	-2.76448	0.0571429	0.302715
				MAP4K4	-2.75086	0.0571429	0.302715
				JAZF1	-2.74978	0.0571429	0.302715
				ESR1	-2.73694	0.114286	0.32526
				SLC8A1	-2.73608	0.228571	0.449868
				GPHN	-2.72684	0.228571	0.449868
				FBXL17	-2.7268	0.114286	0.32526
				MBD5	-2.72196	0.0571429	0.302715
				NLRP1	-2.72087	0.0571429	0.302715
				RASA1	-2.71967	0.4	0.588918
				ATRN	-2.71803	0.114286	0.32526
				ITPR2	-2.71683	0.228571	0.449868
				WDFY4	-2.71595	0.114286	0.32526
				ATXN7L1	-2.71307	0.114286	0.32526
				DENND1A	-2.70522	0.228571	0.449868
				USP24	-2.7008	0.0571429	0.302715
				SUFU	-2.69856	0.0571429	0.302715
				ATM	-2.68758	0.0571429	0.302715
				PBX3	-2.68654	0.114286	0.32526
				USP15	-2.68222	0.4	0.588918
				VPS13B	-2.68179	0.0571429	0.302715
				BBS9	-2.67833	0.114286	0.32526
				TRAK1	-2.67807	0.114286	0.32526
				VWA8	-2.67682	0.0571429	0.302715
				PRIM2	-2.6758	0.114286	0.32526
				PITPNC1	-2.67268	0.4	0.588918
				APBA1	-2.67097	0.108408	0.32526
				ARL15	-2.67078	0.114286	0.32526
				SCN9A	-2.66902	0.108408	0.32526
				GNAQ	-2.66855	0.0571429	0.302715
				MTHFD1L	-2.66075	0.114286	0.32526
				CYTH1	-2.66025	0.0571429	0.302715
				THADA	-2.65831	0.114286	0.32526
				CCDC170	-2.65807	0.0571429	0.302715
				CLEC16A	-2.65748	0.114286	0.32526
				ARMH3	-2.65646	0.114286	0.32526
				RABGAP1L	-2.6564	0.228571	0.449868
				ZNF407	-2.65358	0.4	0.588918
				CBLB	-2.65302	0.114286	0.32526
				SRGAP2	-2.65299	0.0571429	0.302715
				ZNF638	-2.65134	0.0571429	0.302715
				PRKCA	-2.65026	0.628571	0.749569
				ATXN1	-2.64801	0.114286	0.32526
				N4BP2L2	-2.64713	0.0571429	0.302715
				ST3GAL1	-2.63701	0.114286	0.32526
				JMJD1C	-2.63172	0.0571429	0.302715
				LRBA	-2.63138	0.0571429	0.302715
				UTRN	-2.62974	0.628571	0.749569
				TBL1X	-2.62729	0.0571429	0.302715
				PACS1	-2.62441	0.114286	0.32526
				RAP1GAP2	-2.62247	0.0571429	0.302715
				FOCAD	-2.62102	0.0571429	0.302715
				SREBF2	-2.6059	0.114286	0.32526
				DIP2B	-2.60582	0.4	0.588918
				RNF111	-2.60067	0.228571	0.449868
				MINK1	-2.59956	0.114286	0.32526
				RCOR1	-2.59742	0.228571	0.449868
				SMG6	-2.59533	0.108408	0.32526
				SOS1	-2.59443	0.628571	0.749569
				FGF13	-2.59431	0.19909	0.449868
				ELP3	-2.59416	0.114286	0.32526
				ABR	-2.59402	0.228571	0.449868
				DTNBP1	-2.59223	0.228571	0.449868
				FTX	-2.59201	0.0571429	0.302715
				DIRC3	-2.58938	0.19909	0.449868
				ARHGEF7	-2.58821	0.228571	0.449868
				CPEB3	-2.58758	0.114286	0.32526
				DOCK1	-2.5864	0.0571429	0.302715

## Sheet: Endothelial
Gene_EPI	log2FC_EPI	p.val_EPI	p.adj_EPI	Gene_NEU	log2FC_NEU	p.val_NEU	p.adj_NEU
MT1X	3.15436	0.0357143	0.170821	DLEU2	-2.59043	0.0357143	0.170821
FTL	3.07839	0.0357143	0.170821	UTRN	-2.59186	0.0357143	0.170821
SELENOM	3.05256	0.0357143	0.170821	FBXO11	-2.5958	0.0357143	0.170821
FTH1	3.02935	0.0357143	0.170821	MIPOL1	-2.60041	0.0357143	0.170821
MIF	2.95398	0.0357143	0.170821	TNKS	-2.61184	0.0357143	0.170821
SOD2	2.92116	0.0357143	0.170821	FUT8	-2.61575	0.0357143	0.170821
TAGLN	2.75298	0.0357143	0.170821	FRY	-2.61585	0.0357143	0.170821
ID2	2.6849	0.0357143	0.170821	HDAC4	-2.62616	0.0357143	0.170821
TIMP1	2.58603	0.0357143	0.170821	CDH13	-2.62625	0.0357143	0.170821
HSPA1A	4.18966	0.142857	0.320929	TBC1D8	-2.63666	0.0357143	0.170821
MT2A	3.33428	0.142857	0.320929	KIF13B	-2.64854	0.0357143	0.170821
HSPA1B	3.1281	0.142857	0.320929	GULP1	-2.65108	0.0357143	0.170821
C2CD4B	3.03752	0.142857	0.320929	AMBRA1	-2.66073	0.0357143	0.170821
IGKC	3.01787	0.142857	0.320929	XPR1	-2.66458	0.0357143	0.170821
FAU	3.00244	0.0714286	0.216209	KIAA1671	-2.67014	0.0357143	0.170821
DNAJB1	2.96884	0.142857	0.320929	ABCC4	-2.67572	0.0357143	0.170821
C11orf96	2.93328	0.0714286	0.216209	MAPK8	-2.68034	0.0357143	0.170821
ATP5F1E	2.92859	0.0714286	0.216209	CYTH1	-2.68665	0.0357143	0.170821
HSPA6	2.89862	0.0667981	0.216209	ATP9B	-2.69627	0.0357143	0.170821
CD44	2.80363	0.0714286	0.216209	LRRC1	-2.70953	0.0357143	0.170821
UBA52	2.78557	0.0714286	0.216209	SPATA13	-2.73047	0.0357143	0.170821
TPT1	2.77037	0.0714286	0.216209	PHLPP1	-2.73761	0.0357143	0.170821
SEC61G	2.75889	0.0714286	0.216209	USP34	-2.74746	0.0357143	0.170821
UBB	2.72367	0.142857	0.320929	RAPGEF2	-2.75915	0.0357143	0.170821
POLR2L	2.71737	0.0714286	0.216209	CMIP	-2.75955	0.0357143	0.170821
NME2	2.7015	0.0714286	0.216209	WDR70	-2.7782	0.0357143	0.170821
TMSB10	2.68811	0.0714286	0.216209	RFX2	-2.80548	0.0357143	0.170821
XIST	2.62394	0.571429	0.668583	EXOC6B	-2.8136	0.0357143	0.170821
HSP90AA1	2.59712	0.142857	0.320929	AOPEP	-2.81598	0.0357143	0.170821
EEF1B2	2.59241	0.0714286	0.216209	PDE8A	-2.81668	0.0357143	0.170821
				FOXN3	-2.82433	0.0357143	0.170821
				COP1	-2.83218	0.0357143	0.170821
				DIP2B	-2.85389	0.0357143	0.170821
				PTK2	-2.87146	0.0357143	0.170821
				STARD9	-2.91042	0.0357143	0.170821
				EEPD1	-2.92379	0.0357143	0.170821
				CACHD1	-2.92714	0.0357143	0.170821
				ARHGEF3	-2.93028	0.0357143	0.170821
				FAM120B	-2.93236	0.0357143	0.170821
				TRIO	-2.93626	0.0357143	0.170821
				PCAT1	-2.93939	0.0357143	0.170821
				SCFD2	-2.99952	0.0357143	0.170821
				THSD7A	-3.00369	0.0357143	0.170821
				FRMD4B	-3.0063	0.0357143	0.170821
				DNM3	-3.00633	0.0357143	0.170821
				ADARB1	-3.03225	0.0357143	0.170821
				FARS2	-3.0487	0.0357143	0.170821
				FMNL3	-3.05013	0.0357143	0.170821
				STAG1	-3.06954	0.0357143	0.170821
				NAALADL2	-3.0915	0.0357143	0.170821
				HOXD3	-3.11341	0.0357143	0.170821
				DLG2	-3.12262	0.0357143	0.170821
				AGAP1	-3.12433	0.0357143	0.170821
				ELMO1	-3.12645	0.0357143	0.170821
				DOCK1	-3.14011	0.0357143	0.170821
				RAPGEF4	-3.14214	0.0357143	0.170821
				CHRM3	-3.14858	0.0357143	0.170821
				ADAMTS6	-3.19308	0.0357143	0.170821
				CCDC85A	-3.19407	0.0357143	0.170821
				PLD1	-3.22756	0.0357143	0.170821
				SNED1	-3.23828	0.0357143	0.170821
				MYO1D	-3.25317	0.0357143	0.170821
				MYRIP	-3.26242	0.0357143	0.170821
				GRK5	-3.2964	0.0357143	0.170821
				CAMK1D	-3.30767	0.0357143	0.170821
				RABGAP1L	-3.32075	0.0357143	0.170821
				MAGI1	-3.3654	0.0357143	0.170821
				RBFOX2	-3.37977	0.0357143	0.170821
				PDE4D	-3.3852	0.0357143	0.170821
				SOX5	-3.39861	0.0357143	0.170821
				SH3RF3	-3.40914	0.0357143	0.170821
				TPO	-3.42051	0.0357143	0.170821
				ST6GALNAC3	-3.43296	0.0357143	0.170821
				PDZD2	-3.4416	0.0357143	0.170821
				PITPNC1	-3.44455	0.0357143	0.170821
				PPP1R16B	-3.44723	0.0357143	0.170821
				GPHN	-3.45421	0.0357143	0.170821
				RFX3	-3.45677	0.0357143	0.170821
				DIAPH2	-3.45879	0.0357143	0.170821
				SIK3	-3.48975	0.0357143	0.170821
				MAML3	-3.49135	0.0357143	0.170821
				MCTP1	-3.49917	0.0357143	0.170821
				ADAMTSL1	-3.54342	0.0357143	0.170821
				NAV3	-3.54668	0.0357143	0.170821
				TANC2	-3.55665	0.0357143	0.170821
				RYR3	-3.58113	0.0357143	0.170821
				GAB1	-3.60234	0.0357143	0.170821
				PDE3A	-3.62146	0.0357143	0.170821
				C22orf34	-3.67907	0.0357143	0.170821
				LDLRAD4	-3.69593	0.0357143	0.170821
				ITPR2	-3.70588	0.0357143	0.170821
				DACH1	-3.70614	0.0357143	0.170821
				TTC28	-3.73316	0.0357143	0.170821
				GSE1	-3.76045	0.0357143	0.170821
				ARHGEF28	-3.76332	0.0357143	0.170821
				BNC2	-3.77789	0.0357143	0.170821
				PLCB1	-3.79831	0.0357143	0.170821
				APBB2	-3.80434	0.0357143	0.170821
				GMDS	-3.83476	0.0357143	0.170821
				VEGFC	-3.84897	0.0357143	0.170821
				ABCB1	-3.85167	0.0357143	0.170821
				CACNA1C	-3.92793	0.0357143	0.170821
				MECOM	-3.93575	0.0357143	0.170821
				RASGRF2	-4.01376	0.0357143	0.170821
				RBMS3	-4.01576	0.0357143	0.170821
				LRP1B	-4.04871	0.0357143	0.170821
				TMTC1	-4.05454	0.0357143	0.170821
				SNTG2	-4.10398	0.0357143	0.170821
				PTPRG	-4.12077	0.0357143	0.170821
				SULF1	-4.16348	0.0357143	0.170821
				DOCK4	-4.22697	0.0357143	0.170821
				PDE10A	-4.26545	0.0357143	0.170821
				PTPRM	-4.37351	0.0357143	0.170821
				ARL15	-4.38575	0.0357143	0.170821
				CCSER1	-4.42921	0.0357143	0.170821
				ANO2	-4.45703	0.0357143	0.170821
				PLCB4	-4.93141	0.0357143	0.170821
				FAM155A	-5.75112	0.0357143	0.170821
				NKAIN2	-4.50536	0.0357701	0.170845
				FBXL7	-4.2079	0.0714286	0.216209
				WWOX	-3.70279	0.392857	0.60379
				IMMP2L	-3.67688	0.392857	0.60379
				RAD51B	-3.63246	0.0714286	0.216209
				IQCJ-SCHIP1	-3.5976	0.0714286	0.216209
				SMYD3	-3.51539	0.0714286	0.216209
				ABI3BP	-3.51241	0.142857	0.320929
				KALRN	-3.39886	0.25	0.466003
				MYO1E	-3.39199	0.0714286	0.216209
				ZFPM2	-3.34056	0.571429	0.668583
				LRMDA	-3.31977	0.571429	0.668583
				PRKN	-3.28861	0.392857	0.60379
				SORBS2	-3.26516	0.0714286	0.216209
				FOXO1	-3.24998	0.0714286	0.216209
				EFNA5	-3.2499	0.25	0.466003
				UTY	-3.24532	0.12663	0.320929
				CHSY3	-3.21831	0.0714286	0.216209
				BBS9	-3.17674	0.142857	0.320929
				CDKAL1	-3.15946	0.0714286	0.216209
				MBD5	-3.14866	0.0714286	0.216209
				BTBD9	-3.148	0.142857	0.320929
				LIMCH1	-3.14699	0.0714286	0.216209
				FGF13	-3.13355	0.0714286	0.216209
				EXOC4	-3.12987	0.571429	0.668583
				NRG3	-3.07469	0.133701	0.320929
				LDB2	-3.06926	0.0714286	0.216209
				VTI1A	-3.03845	0.142857	0.320929
				NR3C2	-3.03742	0.25	0.466003
				DYM	-3.02485	0.0714286	0.216209
				FAF1	-3.02278	0.25	0.466003
				PPARG	-2.99703	0.0714286	0.216209
				NBEA	-2.95513	0.0714286	0.216209
				SUPT3H	-2.94426	0.0714286	0.216209
				MLLT3	-2.93305	0.142857	0.320929
				COMMD10	-2.91107	0.142857	0.320929
				PCCA	-2.90132	0.392857	0.60379
				TBC1D22A	-2.90054	0.142857	0.320929
				CAMKMT	-2.8705	0.0714286	0.216209
				LRBA	-2.85934	0.392857	0.60379
				RALGAPA2	-2.85778	0.571429	0.668583
				PEAK1	-2.85591	0.25	0.466003
				TRAPPC9	-2.85371	0.25	0.466003
				MAGI2	-2.83913	0.571429	0.668583
				FBXL17	-2.82177	0.25	0.466003
				HIVEP2	-2.82062	0.0714286	0.216209
				PELI2	-2.81155	0.142857	0.320929
				MRTFA	-2.80961	0.0714286	0.216209
				INVS	-2.80045	0.0714286	0.216209
				PARD3B	-2.77088	0.571429	0.668583
				TMTC2	-2.76982	0.25	0.466003
				PLXDC2	-2.76776	0.392857	0.60379
				ATXN7L1	-2.7578	0.0714286	0.216209
				GSK3B	-2.75179	0.0714286	0.216209
				DPYD	-2.75047	0.571429	0.668583
				PARD3	-2.74756	0.25	0.466003
				TACR1	-2.74561	0.142857	0.320929
				GLIS3	-2.7334	0.571429	0.668583
				RYR2	-2.7252	0.0714286	0.216209
				DENND1A	-2.71324	0.571429	0.668583
				TLL1	-2.70668	0.0714286	0.216209
				ULK4	-2.70145	0.0714286	0.216209
				BABAM2	-2.6997	0.392857	0.60379
				CASC15	-2.69749	0.142857	0.320929
				ETV6	-2.6897	0.571429	0.668583
				SORBS1	-2.66747	0.0714286	0.216209
				SH3PXD2B	-2.63915	0.142857	0.320929
				ZNF407	-2.63778	0.0714286	0.216209
				TBCK	-2.63343	0.25	0.466003
				LARGE1	-2.60503	0.571429	0.668583
				NXN	-2.60415	0.392857	0.60379
				HDAC9	-2.59991	0.0714286	0.216209
				CCDC7	-2.59736	0.0714286	0.216209
				ZFAND3	-2.58697	0.392857	0.60379

## Sheet: Fibroblast
Gene_EPI	log2FC_EPI	p.val_EPI	p.adj_EPI	Gene_NEU	log2FC_NEU	p.val_NEU	p.adj_NEU
CXCL14	5.31942	0.0357143	0.0844881	TBCK	-2.59335	0.0357143	0.0844881
CFD	4.6902	0.0357143	0.0844881	PRELID2	-2.60698	0.0357143	0.0844881
FAU	4.57727	0.0357143	0.0844881	MON2	-2.60776	0.0357143	0.0844881
FTH1	4.53121	0.0357143	0.0844881	INVS	-2.61127	0.0357143	0.0844881
UBA52	4.25272	0.0357143	0.0844881	CTIF	-2.6205	0.0357143	0.0844881
CXCL2	4.20399	0.0357143	0.0844881	DYNC1I1	-2.62157	0.0357143	0.0844881
TIMP1	4.03069	0.0357143	0.0844881	DYNC2H1	-2.62308	0.0357143	0.0844881
MT2A	4.00486	0.0357143	0.0844881	ZCCHC7	-2.62481	0.0357143	0.0844881
TPT1	3.99348	0.0357143	0.0844881	ZNF407	-2.63185	0.0357143	0.0844881
PTMA	3.89837	0.0357143	0.0844881	RASGRF2	-2.63367	0.0357143	0.0844881
EEF1B2	3.85332	0.0357143	0.0844881	THSD4	-2.64163	0.0357143	0.0844881
SOCS3	3.83761	0.0357143	0.0844881	TIAM2	-2.65122	0.0357143	0.0844881
MIF	3.80401	0.0357143	0.0844881	CADM2	-2.65331	0.0357143	0.0844881
EEF1A1	3.78133	0.0357143	0.0844881	ZNF438	-2.65395	0.0357143	0.0844881
IER3	3.76012	0.0357143	0.0844881	CSRNP3	-2.65439	0.0357143	0.0844881
NME2	3.74521	0.0357143	0.0844881	OPHN1	-2.66091	0.0357143	0.0844881
TMSB10	3.7386	0.0357143	0.0844881	ITPR2	-2.66369	0.0357143	0.0844881
MT1X	3.73592	0.0357143	0.0844881	MAP2K5	-2.66495	0.0357143	0.0844881
C11orf96	3.70189	0.0357143	0.0844881	FMNL2	-2.67564	0.0357143	0.0844881
S100A11	3.61211	0.0357143	0.0844881	CLASP2	-2.67954	0.0357143	0.0844881
B2M	3.61063	0.0357143	0.0844881	RIC1	-2.68144	0.0357143	0.0844881
EGR1	3.58017	0.0357143	0.0844881	FCHSD2	-2.68447	0.0357143	0.0844881
TMSB4X	3.57547	0.0357143	0.0844881	PKNOX2	-2.68844	0.0357143	0.0844881
UBB	3.57147	0.0357143	0.0844881	TMCC1	-2.68984	0.0357143	0.0844881
NACA	3.53658	0.0357143	0.0844881	LRBA	-2.69287	0.0357143	0.0844881
CXCL3	3.51554	0.0357143	0.0844881	HIP1	-2.69639	0.0357143	0.0844881
EEF1G	3.42333	0.0357143	0.0844881	RAPGEF2	-2.70229	0.0357143	0.0844881
SELENOM	3.38078	0.0357143	0.0844881	KCNIP1	-2.70921	0.0357143	0.0844881
FTL	3.37054	0.0357143	0.0844881	TTC28	-2.71	0.0357143	0.0844881
S100A10	3.35656	0.0357143	0.0844881	TMEM135	-2.72226	0.0357143	0.0844881
BTF3	3.33997	0.0357143	0.0844881	UACA	-2.72502	0.0357143	0.0844881
GSTP1	3.3252	0.0357143	0.0844881	DIP2C	-2.72659	0.0357143	0.0844881
ATP5F1E	3.32418	0.0357143	0.0844881	USP54	-2.72848	0.0357143	0.0844881
IFITM3	3.31201	0.0357143	0.0844881	FTO	-2.7302	0.0357143	0.0844881
EIF1	3.30935	0.0357143	0.0844881	BABAM2	-2.73407	0.0357143	0.0844881
IFITM2	3.30843	0.0357143	0.0844881	GPC6	-2.73526	0.0357143	0.0844881
GAPDH	3.28286	0.0357143	0.0844881	FBXO42	-2.73665	0.0357143	0.0844881
CEBPB	3.27945	0.0357143	0.0844881	STARD13	-2.74008	0.0357143	0.0844881
CD63	3.27808	0.0357143	0.0844881	COL21A1	-2.74361	0.0357143	0.0844881
SNHG29	3.27595	0.0357143	0.0844881	PTPRJ	-2.74382	0.0357143	0.0844881
S100A6	3.26982	0.0357143	0.0844881	PCCA	-2.74424	0.0357143	0.0844881
H3F3B	3.22417	0.0357143	0.0844881	AMBRA1	-2.74631	0.0357143	0.0844881
SSR4	3.22007	0.0357143	0.0844881	EXOC4	-2.74635	0.0357143	0.0844881
PTGDS	3.17586	0.0357143	0.0844881	CADPS2	-2.75228	0.0357143	0.0844881
RACK1	3.16795	0.0357143	0.0844881	PTK2	-2.75531	0.0357143	0.0844881
PHLDA1	3.16236	0.0357143	0.0844881	ASAP2	-2.76213	0.0357143	0.0844881
IER2	3.14376	0.0357143	0.0844881	PHLPP1	-2.77028	0.0357143	0.0844881
MYL12B	3.12825	0.0357143	0.0844881	STK39	-2.77521	0.0357143	0.0844881
CST3	3.11375	0.0357143	0.0844881	UBE2E2	-2.78856	0.0357143	0.0844881
SOD2	3.08615	0.0357143	0.0844881	NTRK3	-2.80057	0.0357143	0.0844881
COX4I1	3.04002	0.0357143	0.0844881	ARHGEF10L	-2.80266	0.0357143	0.0844881
APOE	3.02376	0.0357143	0.0844881	ITGA11	-2.80309	0.0357143	0.0844881
NFKBIA	3.00201	0.0357143	0.0844881	SLC24A3	-2.81204	0.0357143	0.0844881
SERF2	2.93902	0.0357143	0.0844881	FRMD3	-2.81332	0.0357143	0.0844881
TFPI2	2.92	0.0357143	0.0844881	BNC2	-2.81505	0.0357143	0.0844881
SRP14	2.91593	0.0357143	0.0844881	AHCYL2	-2.81852	0.0357143	0.0844881
MYC	2.90555	0.0357143	0.0844881	AOPEP	-2.82151	0.0357143	0.0844881
PFDN5	2.89865	0.0357143	0.0844881	SNX29	-2.82572	0.0357143	0.0844881
TMEM176A	2.8886	0.0357143	0.0844881	DNM3	-2.84489	0.0357143	0.0844881
SET	2.87715	0.0357143	0.0844881	TNKS	-2.8479	0.0357143	0.0844881
EEF1D	2.86998	0.0357143	0.0844881	ANKRD36	-2.85145	0.0357143	0.0844881
MYL12A	2.86925	0.0357143	0.0844881	PDZD2	-2.85244	0.0357143	0.0844881
SUMO2	2.85186	0.0357143	0.0844881	NHSL2	-2.85515	0.0357143	0.0844881
JUNB	2.81484	0.0357143	0.0844881	ULK4	-2.8562	0.0357143	0.0844881
BTG1	2.80819	0.0357143	0.0844881	STAG1	-2.86147	0.0357143	0.0844881
H3F3A	2.80218	0.0357143	0.0844881	ARHGEF7	-2.86263	0.0357143	0.0844881
HINT1	2.79617	0.0357143	0.0844881	DLEU2	-2.863	0.0357143	0.0844881
EGR3	2.73934	0.0357143	0.0844881	CRADD	-2.86474	0.0357143	0.0844881
PPIB	2.73279	0.0357143	0.0844881	RUNX2	-2.86601	0.0357143	0.0844881
MAFF	2.69035	0.0357143	0.0844881	ADCY9	-2.86703	0.0357143	0.0844881
PNRC1	2.68314	0.0357143	0.0844881	UBR3	-2.86917	0.0357143	0.0844881
RNASEK	2.67125	0.0357143	0.0844881	DOCK9	-2.8721	0.0357143	0.0844881
IRF1	2.65422	0.0357143	0.0844881	GMDS-DT	-2.87267	0.0357143	0.0844881
CTSC	2.63908	0.0357143	0.0844881	FBXL17	-2.88655	0.0357143	0.0844881
PIM3	2.63839	0.0357143	0.0844881	ARHGAP32	-2.88765	0.0357143	0.0844881
PFN1	2.63543	0.0357143	0.0844881	ADGRL3	-2.88916	0.0357143	0.0844881
EID1	2.61251	0.0357143	0.0844881	AGAP1	-2.89325	0.0357143	0.0844881
PPIA	2.59884	0.0357143	0.0844881	CEP112	-2.92728	0.0357143	0.0844881
CD302	2.58596	0.0357143	0.0844881	NHS	-2.93024	0.0357143	0.0844881
CXCL1	3.67499	0.0357701	0.0844881	VPS13D	-2.93678	0.0357143	0.0844881
HSPA1A	4.03977	0.142857	0.225765	PPFIA2	-2.93818	0.0357143	0.0844881
ADAMDEC1	3.92502	0.359397	0.50403	ERC1	-2.9469	0.0357143	0.0844881
DNAJB1	3.59563	0.0714286	0.132215	PRKCA	-2.95765	0.0357143	0.0844881
LGALS1	3.59203	0.0714286	0.132215	PCDH9	-2.96249	0.0357143	0.0844881
FOSB	3.36905	0.142857	0.225765	GAB1	-2.9626	0.0357143	0.0844881
IGKC	3.34192	0.12663	0.225765	SLC39A11	-2.96893	0.0357143	0.0844881
XIST	3.31048	0.764228	0.828179	PRKCE	-2.97711	0.0357143	0.0844881
HSP90AB1	3.1545	0.0714286	0.132215	DIP2B	-2.98739	0.0357143	0.0844881
LUM	3.11245	0.0714286	0.132215	CSGALNACT1	-3.00057	0.0357143	0.0844881
HSPA1B	3.06612	0.142857	0.225765	GLI2	-3.00435	0.0357143	0.0844881
APOD	3.02903	0.230243	0.352484	MICAL3	-3.01112	0.0357143	0.0844881
PLA2G2A	2.7587	0.133701	0.225765	TMEM117	-3.03267	0.0357143	0.0844881
SOX4	2.72589	0.142857	0.225765	DISC1	-3.0417	0.0357143	0.0844881
SFRP1	2.70161	0.571429	0.640815	RASAL2	-3.04218	0.0357143	0.0844881
CCL2	2.68881	0.142857	0.225765	PDZRN3	-3.04289	0.0357143	0.0844881
CXCL8	2.64908	0.171857	0.27135	HMCN1	-3.04538	0.0357143	0.0844881
HSP90AA1	2.64415	0.0714286	0.132215	MBD5	-3.04869	0.0357143	0.0844881
HSPE1	2.62876	0.0714286	0.132215	KIRREL3	-3.04875	0.0357143	0.0844881
DNAJA1	2.62696	0.0714286	0.132215	ARHGAP26	-3.06448	0.0357143	0.0844881
HSPA8	2.60725	0.0714286	0.132215	PLCB4	-3.07472	0.0357143	0.0844881
HSPB1	2.58546	0.142857	0.225765	ZBTB7C	-3.07569	0.0357143	0.0844881
				FER	-3.08467	0.0357143	0.0844881
				ERG	-3.10149	0.0357143	0.0844881
				PTPRD	-3.10583	0.0357143	0.0844881
				RBFOX1	-3.11162	0.0357143	0.0844881
				EXOC6B	-3.11846	0.0357143	0.0844881
				AKAP6	-3.12214	0.0357143	0.0844881
				NAALADL2	-3.12639	0.0357143	0.0844881
				TBC1D5	-3.13875	0.0357143	0.0844881
				PRKD1	-3.15008	0.0357143	0.0844881
				MYO1D	-3.15586	0.0357143	0.0844881
				KCNT2	-3.15862	0.0357143	0.0844881
				ROR1	-3.16929	0.0357143	0.0844881
				CDK14	-3.18019	0.0357143	0.0844881
				GAB2	-3.18408	0.0357143	0.0844881
				CAMKMT	-3.19617	0.0357143	0.0844881
				TANC2	-3.19721	0.0357143	0.0844881
				SUPT3H	-3.19747	0.0357143	0.0844881
				DANT2	-3.20851	0.0357143	0.0844881
				WDPCP	-3.21325	0.0357143	0.0844881
				PPP2R2B	-3.21804	0.0357143	0.0844881
				ATP10A	-3.22084	0.0357143	0.0844881
				FOXP2	-3.24835	0.0357143	0.0844881
				ANKS1B	-3.25492	0.0357143	0.0844881
				ARL15	-3.2564	0.0357143	0.0844881
				RORA	-3.25714	0.0357143	0.0844881
				SMYD3	-3.26726	0.0357143	0.0844881
				RCAN2	-3.27459	0.0357143	0.0844881
				VTI1A	-3.28357	0.0357143	0.0844881
				BCAS3	-3.30451	0.0357143	0.0844881
				BBS9	-3.30585	0.0357143	0.0844881
				NLGN1	-3.335	0.0357143	0.0844881
				VPS13B	-3.33561	0.0357143	0.0844881
				CACNB2	-3.34823	0.0357143	0.0844881
				NPAS3	-3.35563	0.0357143	0.0844881
				FAF1	-3.37804	0.0357143	0.0844881
				SORBS1	-3.40758	0.0357143	0.0844881
				TRIO	-3.41529	0.0357143	0.0844881
				FREM1	-3.42263	0.0357143	0.0844881
				CDKAL1	-3.4483	0.0357143	0.0844881
				ABCA10	-3.46733	0.0357143	0.0844881
				EHBP1	-3.46981	0.0357143	0.0844881
				KLF12	-3.48478	0.0357143	0.0844881
				BTBD9	-3.50737	0.0357143	0.0844881
				PARD3	-3.50761	0.0357143	0.0844881
				MIR99AHG	-3.52425	0.0357143	0.0844881
				PARD3B	-3.54672	0.0357143	0.0844881
				DMD	-3.57988	0.0357143	0.0844881
				NAV3	-3.60241	0.0357143	0.0844881
				MAGI1	-3.66477	0.0357143	0.0844881
				MAGI2	-3.67217	0.0357143	0.0844881
				COL8A1	-3.69701	0.0357143	0.0844881
				FBXL7	-3.70166	0.0357143	0.0844881
				SORBS2	-3.70995	0.0357143	0.0844881
				PRKN	-3.75969	0.0357143	0.0844881
				ERBB4	-3.81542	0.0357143	0.0844881
				SUGCT	-3.82104	0.0357143	0.0844881
				FRY	-3.82703	0.0357143	0.0844881
				LRMDA	-3.86327	0.0357143	0.0844881
				WWOX	-3.87641	0.0357143	0.0844881
				CASC15	-4.00083	0.0357143	0.0844881
				MACROD2	-4.00601	0.0357143	0.0844881
				IMMP2L	-4.15294	0.0357143	0.0844881
				KCNMA1	-4.18518	0.0357143	0.0844881
				DLG2	-4.25476	0.0357143	0.0844881
				KCND2	-4.27691	0.0357143	0.0844881
				SOX5	-4.573	0.0357143	0.0844881
				PDZRN4	-4.83439	0.0357143	0.0844881
				FOCAD	-3.19457	0.0357701	0.0844881
				FRMD5	-3.21262	0.0357701	0.0844881
				EDA	-3.22354	0.0357701	0.0844881
				GALNT17	-3.42462	0.0357701	0.0844881
				CTNNA3	-4.21383	0.0357701	0.0844881
				NRXN3	-4.36335	0.0719241	0.13236
				PRKG1	-4.11735	0.0714286	0.132215
				RAD51B	-3.92924	0.25	0.352484
				CACNA1C	-3.84895	0.0714286	0.132215
				ZFPM2	-3.8153	0.25	0.352484
				NRXN1	-3.71722	0.0719241	0.13236
				ADGRB3	-3.6884	0.0714286	0.132215
				RYR2	-3.6581	0.0719241	0.13236
				IL1RAPL1	-3.65565	0.0714286	0.132215
				PLCB1	-3.62057	0.0714286	0.132215
				GPHN	-3.5858	0.0714286	0.132215
				TENM4	-3.51856	0.0719241	0.13236
				TENM2	-3.48524	0.177113	0.279521
				PLCL1	-3.46664	0.0714286	0.132215
				RGS6	-3.42897	0.0719241	0.13236
				NCKAP5	-3.29326	0.142857	0.225765
				PDE3A	-3.27279	0.0714286	0.132215
				KALRN	-3.2556	0.0714286	0.132215
				KIAA1328	-3.24503	0.0714286	0.132215
				AFF3	-3.14817	0.0714286	0.132215
				UTY	-3.08065	0.2217	0.349258
				ADARB1	-3.0688	0.142857	0.225765
				EBF1	-3.06874	0.0714286	0.132215
				APBB2	-3.06304	0.0714286	0.132215
				COL11A1	-3.05428	0.12663	0.225765
				AUTS2	-2.99367	0.0714286	0.132215
				TTTY14	-2.96696	0.12663	0.225765
				LDLRAD4	-2.96137	0.142857	0.225765
				CDH19	-2.96117	0.2217	0.349258
				LARGE1	-2.96087	0.571429	0.640815
				EBF2	-2.95883	0.142857	0.225765
				TEX41	-2.92723	0.0714286	0.132215
				DOCK4	-2.92327	0.142857	0.225765
				NR3C2	-2.91382	0.142857	0.225765
				BACH2	-2.87849	0.0714286	0.132215
				DLC1	-2.87036	0.142857	0.225765
				RFX3	-2.86997	0.0714286	0.132215
				CHSY3	-2.85107	0.0714286	0.132215
				SPECC1	-2.83925	0.0714286	0.132215
				UNC5C	-2.83325	0.142857	0.225765
				FHIT	-2.82309	0.142857	0.225765
				LAMA2	-2.79463	0.142857	0.225765
				XYLT1	-2.78511	0.0714286	0.132215
				ASTN2	-2.76919	0.0714286	0.132215
				DTNA	-2.76175	0.571429	0.640815
				DENND1A	-2.74901	0.0714286	0.132215
				USP9Y	-2.74732	0.171857	0.27135
				CCDC171	-2.74326	0.0719241	0.13236
				ARHGEF28	-2.74295	0.0714286	0.132215
				DPYD	-2.73861	0.142857	0.225765
				NALCN	-2.73747	0.0714286	0.132215
				CDH13	-2.73508	0.0714286	0.132215
				GMDS	-2.73282	0.142857	0.225765
				ITGBL1	-2.72815	0.25	0.352484
				LRP1B	-2.72459	0.0714286	0.132215
				PCSK5	-2.71473	0.25	0.352484
				ARHGAP10	-2.69022	0.0714286	0.132215
				NAV2	-2.6428	0.25	0.352484
				MRTFA	-2.64141	0.142857	0.225765
				MAML3	-2.63532	0.571429	0.640815
				SMURF1	-2.62899	0.0714286	0.132215
				TENM3	-2.60853	0.571429	0.640815
				ROBO2	-2.60164	0.0714286	0.132215
				BCL2	-2.59016	0.25	0.352484

## Sheet: intersect_EPI
					all_cell_types
					MIF
					TPT1
					FTL
					MT2A
					FAU
					ATP5F1E
					TMSB10
					UBA52
					FTH1

## Sheet: intersect_NEU
					all_cell_types
					EXOC6B
					GPHN
					WWOX
					IMMP2L
					RAD51B

## Sheet: bulk
Gene	log2FC	p.val	p.adj	Name	diffexpressed	delabel	subtype
UNC45B	2.55235	0.00620662	0.016252	bulk	UP	UNC45B	EPI
HFM1	2.29859	0.000845687	0.00343828	bulk	UP	HFM1	EPI
SLCO5A1	2.28562	0.000624312	0.00276933	bulk	UP	SLCO5A1	EPI
DLG2	1.95258	0.0178098	0.0382725	bulk	UP	DLG2	EPI
TFF3	1.81582	8.21218e-05	0.000681748	bulk	UP	TFF3	EPI
DES	1.71836	0.00969622	0.0234667	bulk	UP	DES	EPI
NPW	1.6995	0.0222476	0.0461248	bulk	UP	NPW	EPI
ANKRD30BL	1.6239	0.0232424	0.0479198	bulk	UP	ANKRD30BL	EPI
AGR2	1.47598	0.00432446	0.012165	bulk	UP	AGR2	EPI
MEP1A	1.24162	0.00879678	0.0216873	bulk	UP	MEP1A	EPI
DHCR24	1.18162	0.0026676	0.00833221	bulk	UP	DHCR24	EPI
MDK	1.17057	0.000333613	0.00175176	bulk	UP	MDK	EPI
S100A6	1.15625	1.97679e-06	0.000125941	bulk	UP	S100A6	EPI
ECM1	1.13766	0.0222476	0.0461248	bulk	UP	ECM1	EPI
SNORA31	1.12469	0.000585377	0.00264766	bulk	UP	SNORA31	EPI
SNORD72	1.11446	0.000100678	0.000790303	bulk	UP	SNORD72	EPI
SNORA3B	1.09754	5.3641e-05	0.000534393	bulk	UP	SNORA3B	EPI
FXYD3	1.08831	2.08886e-05	0.000319182	bulk	UP	FXYD3	EPI
MYL9	1.08649	0.00686574	0.0176361	bulk	UP	MYL9	EPI
IL2RG	0.998671	0.012313	0.0283897	bulk	UP	IL2RG	EPI
CD151	0.975904	2.25031e-05	0.000329454	bulk	UP	CD151	EPI
TMSB10	0.968273	3.02283e-05	0.000388911	bulk	UP	TMSB10	EPI
EFHD2	0.909119	1.19838e-06	0.000122109	bulk	UP	EFHD2	EPI
EEF1G	0.907076	2.75349e-07	0.000122109	bulk	UP	EEF1G	EPI
OOEP	0.90303	1.41748e-06	0.000122109	bulk	UP	OOEP	EPI
MAOA	0.888925	0.000897905	0.0035892	bulk	UP	MAOA	EPI
PCSK1N	0.879883	0.000430007	0.00210367	bulk	UP	PCSK1N	EPI
IFI6	0.870365	0.00152165	0.00534873	bulk	UP	IFI6	EPI
PHGR1	0.869354	0.001706	0.00587172	bulk	UP	PHGR1	EPI
ANXA2	0.869273	0.00432446	0.012165	bulk	UP	ANXA2	EPI
CBR1	0.867599	0.000402491	0.00202511	bulk	UP	CBR1	EPI
SNORA33	0.861146	0.000256901	0.00146463	bulk	UP	SNORA33	EPI
CST3	0.83946	1.66808e-05	0.000280087	bulk	UP	CST3	EPI
TAOK3	0.833804	8.53789e-07	0.000122109	bulk	UP	TAOK3	EPI
SNORA52	0.832051	6.63255e-05	0.000598728	bulk	UP	SNORA52	EPI
SELENOM	0.821066	2.14674e-06	0.000125941	bulk	UP	SELENOM	EPI
S100A11	0.816477	0.000587082	0.00264766	bulk	UP	S100A11	EPI
SDC1	0.809991	0.000749596	0.00316224	bulk	UP	SDC1	EPI
PLAAT4	0.799619	7.14227e-05	0.000622487	bulk	UP	PLAAT4	EPI
CLDN3	0.795444	4.66877e-05	0.00050183	bulk	UP	CLDN3	EPI
TPT1	0.789246	9.04909e-06	0.000211763	bulk	UP	TPT1	EPI
SMIM24	0.788113	0.000796297	0.0032938	bulk	UP	SMIM24	EPI
APOO	0.781172	2.97775e-06	0.000144329	bulk	UP	APOO	EPI
FAU	0.780752	3.79532e-06	0.000151841	bulk	UP	FAU	EPI
CBR1-AS1	0.773881	0.000551927	0.0025197	bulk	UP	CBR1-AS1	EPI
PRDX5	0.771378	3.50142e-06	0.00014866	bulk	UP	PRDX5	EPI
MIR924HG	0.771181	7.19494e-07	0.000122109	bulk	UP	MIR924HG	EPI
AMBRA1	0.76791	7.19494e-07	0.000122109	bulk	UP	AMBRA1	EPI
SLC35F1	0.766032	2.74496e-06	0.00013711	bulk	UP	SLC35F1	EPI
DGKI	0.764555	7.16283e-06	0.000195302	bulk	UP	DGKI	EPI
LGALS1	0.759	0.0129059	0.0295161	bulk	UP	LGALS1	EPI
SCGN	0.754796	0.00331506	0.00988696	bulk	UP	SCGN	EPI
ARL14EPL	0.75403	0.000151902	0.00102719	bulk	UP	ARL14EPL	EPI
CHCHD3	0.752213	9.29688e-07	0.000122109	bulk	UP	CHCHD3	EPI
UBE2Q2P2	0.748233	3.23862e-05	0.000404407	bulk	UP	UBE2Q2P2	EPI
LGALS3BP	0.743237	3.25213e-05	0.000404407	bulk	UP	LGALS3BP	EPI
NME2	0.743235	0.000132272	0.000938196	bulk	UP	NME2	EPI
TOMM7	0.743216	1.66808e-05	0.000280087	bulk	UP	TOMM7	EPI
SELENOW	0.738708	8.21218e-05	0.000681748	bulk	UP	SELENOW	EPI
LGALS4	0.725279	0.010176	0.0243895	bulk	UP	LGALS4	EPI
FTL	0.721121	5.65611e-06	0.000176021	bulk	UP	FTL	EPI
TMEM98	0.720176	0.0012793	0.00468237	bulk	UP	TMEM98	EPI
AGPAT2	0.7143	6.65813e-05	0.000598728	bulk	UP	AGPAT2	EPI
ASPH	0.713966	7.65958e-05	0.000653207	bulk	UP	ASPH	EPI
SNORA72	0.709141	7.11504e-05	0.000622487	bulk	UP	SNORA72	EPI
APLP2	0.701598	3.76122e-05	0.000441831	bulk	UP	APLP2	EPI
CHPF	0.701295	0.000115878	0.000862048	bulk	UP	CHPF	EPI
HPCAL1	0.70049	0.000293387	0.00159844	bulk	UP	HPCAL1	EPI
IHH	0.699375	0.00432446	0.012165	bulk	UP	IHH	EPI
CSF1R	0.698534	1.54676e-05	0.00027041	bulk	UP	CSF1R	EPI
MISP	0.698506	5.65611e-06	0.000176021	bulk	UP	MISP	EPI
TSPAN9	0.695881	5.78147e-05	0.000549841	bulk	UP	TSPAN9	EPI
EEF1B2	0.694808	1.541e-06	0.00012378	bulk	UP	EEF1B2	EPI
MIF	0.694398	0.000747499	0.00316224	bulk	UP	MIF	EPI
NOP53	0.692511	3.25213e-05	0.000404407	bulk	UP	NOP53	EPI
HSPB1	0.688337	0.0135238	0.030623	bulk	UP	HSPB1	EPI
BSG	0.688095	0.000173642	0.00111702	bulk	UP	BSG	EPI
CHGB	0.686063	0.0186296	0.0396897	bulk	UP	CHGB	EPI
OST4	0.683342	9.30355e-08	0.000122109	bulk	UP	OST4	EPI
NME1-NME2	0.681308	0.000132743	0.000938196	bulk	UP	NME1-NME2	EPI
DBI	0.678959	0.0212901	0.0445436	bulk	UP	DBI	EPI
KRT8	0.678687	1.79845e-05	0.000289701	bulk	UP	KRT8	EPI
C1QA	0.675448	0.00589891	0.0156462	bulk	UP	C1QA	EPI
SYNGR2	0.674915	7.16283e-06	0.000195302	bulk	UP	SYNGR2	EPI
DTL	0.673182	0.000173642	0.00111702	bulk	UP	DTL	EPI
TM4SF5	0.673175	0.0026676	0.00833221	bulk	UP	TM4SF5	EPI
EEF1A1	0.670327	1.32887e-05	0.000249962	bulk	UP	EEF1A1	EPI
B2M	0.667499	0.000185579	0.00116976	bulk	UP	B2M	EPI
H1-10	0.664968	0.000587082	0.00264766	bulk	UP	H1-10	EPI
AHCY	0.663897	1.93848e-05	0.000304019	bulk	UP	AHCY	EPI
TXNRD1	0.661504	1.01206e-06	0.000122109	bulk	UP	TXNRD1	EPI
BAIAP2L1	0.66145	3.22942e-06	0.000144329	bulk	UP	BAIAP2L1	EPI
MIR1282	0.660998	7.63061e-05	0.000653207	bulk	UP	MIR1282	EPI
CFL1	0.660172	1.79845e-05	0.000289701	bulk	UP	CFL1	EPI
PFN1	0.658726	1.54676e-05	0.00027041	bulk	UP	PFN1	EPI
RHOC	0.652657	4.04329e-05	0.000460409	bulk	UP	RHOC	EPI
FCGRT	0.651003	0.00025774	0.00146463	bulk	UP	FCGRT	EPI
SSR4	0.649656	0.00012404	0.000904657	bulk	UP	SSR4	EPI
C12orf57	0.648606	3.49789e-05	0.000417499	bulk	UP	C12orf57	EPI
MARCKS	0.648067	0.00721833	0.0183908	bulk	UP	MARCKS	EPI
ELOB	0.64526	4.66877e-05	0.00050183	bulk	UP	ELOB	EPI
SLC25A5	0.645056	0.000142018	0.0009793	bulk	UP	SLC25A5	EPI
TMSB4X	0.644475	0.001706	0.00587172	bulk	UP	TMSB4X	EPI
FDFT1	0.638455	5.38528e-05	0.000534393	bulk	UP	FDFT1	EPI
VKORC1	0.638278	0.000240686	0.00140721	bulk	UP	VKORC1	EPI
GPX1	0.637706	2.33067e-06	0.000125941	bulk	UP	GPX1	EPI
HIGD1A	0.637291	8.21218e-05	0.000681748	bulk	UP	HIGD1A	EPI
MVP	0.635556	4.32787e-05	0.000480985	bulk	UP	MVP	EPI
ECI1	0.634181	7.14227e-05	0.000622487	bulk	UP	ECI1	EPI
NACA	0.631666	0.000115878	0.000862048	bulk	UP	NACA	EPI
NBEAL1	0.6315	3.79532e-06	0.000151841	bulk	UP	NBEAL1	EPI
PPDPF	0.630361	0.000624312	0.00276933	bulk	UP	PPDPF	EPI
H2AJ	0.628971	3.25213e-05	0.000404407	bulk	UP	H2AJ	EPI
HOPX	0.62843	0.00532441	0.014366	bulk	UP	HOPX	EPI
ACADS	0.627376	0.000185579	0.00116976	bulk	UP	ACADS	EPI
TMEM141	0.623906	0.000624312	0.00276933	bulk	UP	TMEM141	EPI
POLQ	0.621123	1.8198e-06	0.000125941	bulk	UP	POLQ	EPI
CD68	0.61528	0.00480093	0.013236	bulk	UP	CD68	EPI
KIAA2013	0.614779	7.74534e-06	0.000201922	bulk	UP	KIAA2013	EPI
TPI1	0.613328	6.62235e-06	0.000186556	bulk	UP	TPI1	EPI
SEPHS2	0.612391	0.000275023	0.00153065	bulk	UP	SEPHS2	EPI
UBL5	0.611166	0.000151902	0.00102719	bulk	UP	UBL5	EPI
MYL6	0.60845	0.000518742	0.00241457	bulk	UP	MYL6	EPI
PLS1	0.608273	0.00589891	0.0156462	bulk	UP	PLS1	EPI
ELL3	0.606377	1.79845e-05	0.000289701	bulk	UP	ELL3	EPI
AURKAIP1	0.60564	3.79532e-06	0.000151841	bulk	UP	AURKAIP1	EPI
CDH17	0.605	0.00410268	0.0117129	bulk	UP	CDH17	EPI
SLC40A1	0.604409	0.00213772	0.00701248	bulk	UP	SLC40A1	EPI
SERF2	0.603782	2.79711e-05	0.000376045	bulk	UP	SERF2	EPI
EIF5A	0.603728	5.38528e-05	0.000534393	bulk	UP	EIF5A	EPI
PHB1	0.603345	2.14674e-06	0.000125941	bulk	UP	PHB1	EPI
S100A10	0.602322	0.000333613	0.00175176	bulk	UP	S100A10	EPI
PEBP1	0.601582	0.000953098	0.00374436	bulk	UP	PEBP1	EPI
SH3BGRL3	0.601291	0.000457876	0.0022109	bulk	UP	SH3BGRL3	EPI
SPINT2	0.599947	3.76122e-05	0.000441831	bulk	UP	SPINT2	EPI
SSR2	0.598923	6.60222e-07	0.000122109	bulk	UP	SSR2	EPI
SLC25A6	0.598078	0.00281132	0.00872287	bulk	UP	SLC25A6	EPI
FTH1	0.596224	4.66844e-07	0.000122109	bulk	UP	FTH1	EPI
PRDX1	0.593145	0.000108223	0.000821558	bulk	UP	PRDX1	EPI
ATP5F1D	0.592361	6.20516e-05	0.000573615	bulk	UP	ATP5F1D	EPI
POLA1	0.590114	1.66808e-05	0.000280087	bulk	UP	POLA1	EPI
SH3BGRL	0.587994	0.00191069	0.00640922	bulk	UP	SH3BGRL	EPI
EPCAM	0.586874	8.37299e-06	0.000204811	bulk	UP	EPCAM	EPI
CLDN4	0.586174	0.00432446	0.012165	bulk	UP	CLDN4	EPI
PPIB	0.585698	3.49789e-05	0.000417499	bulk	UP	PPIB	EPI
C5orf34	0.585271	0.00107303	0.00409114	bulk	UP	C5orf34	EPI
ZNF445	-0.585175	1.54676e-05	0.00027041	bulk	DOWN	ZNF445	NEU
PDE4DIP	-0.585476	0.00143291	0.00509775	bulk	DOWN	PDE4DIP	NEU
CLCN6	-0.585691	8.37299e-06	0.000204811	bulk	DOWN	CLCN6	NEU
ADCY2	-0.586849	3.49789e-05	0.000417499	bulk	DOWN	ADCY2	NEU
ZNF251	-0.587304	0.0029753	0.00911137	bulk	DOWN	ZNF251	NEU
TMC5	-0.588358	0.00480093	0.013236	bulk	DOWN	TMC5	NEU
SPAG16	-0.588415	4.34537e-05	0.000480985	bulk	DOWN	SPAG16	NEU
THBS3	-0.588853	0.00620662	0.016252	bulk	DOWN	THBS3	NEU
ATG14	-0.589342	0.000185579	0.00116976	bulk	DOWN	ATG14	NEU
TMEM131L	-0.590356	3.25213e-05	0.000404407	bulk	DOWN	TMEM131L	NEU
MLLT10	-0.590874	7.65958e-05	0.000653207	bulk	DOWN	MLLT10	NEU
MKNK1	-0.591009	0.00532441	0.014366	bulk	DOWN	MKNK1	NEU
CTC1	-0.591243	0.000173642	0.00111702	bulk	DOWN	CTC1	NEU
RAB2B	-0.591675	4.11277e-06	0.000151841	bulk	DOWN	RAB2B	NEU
CYP4F3	-0.59221	0.00349787	0.0102826	bulk	DOWN	CYP4F3	NEU
OTUD4	-0.594188	1.41748e-06	0.000122109	bulk	DOWN	OTUD4	NEU
SLF2	-0.594561	0.000198285	0.00122899	bulk	DOWN	SLF2	NEU
DZIP3	-0.595607	2.42359e-05	0.000344636	bulk	DOWN	DZIP3	NEU
PKD2	-0.595711	0.000142018	0.0009793	bulk	DOWN	PKD2	NEU
CPSF1	-0.595963	0.0111993	0.0263952	bulk	DOWN	CPSF1	NEU
ELMO1	-0.596264	0.0212901	0.0445436	bulk	DOWN	ELMO1	NEU
GRK3	-0.596285	0.000101048	0.000790303	bulk	DOWN	GRK3	NEU
SF3B1	-0.596319	0.00180568	0.00616129	bulk	DOWN	SF3B1	NEU
SRSF6	-0.59708	0.000551927	0.0025197	bulk	DOWN	SRSF6	NEU
CGNL1	-0.597267	0.00368981	0.0107143	bulk	DOWN	CGNL1	NEU
NSD1	-0.598618	4.04329e-05	0.000460409	bulk	DOWN	NSD1	NEU
STXBP1	-0.598905	0.000845687	0.00343828	bulk	DOWN	STXBP1	NEU
AFF4	-0.599146	2.42359e-05	0.000344636	bulk	DOWN	AFF4	NEU
TACC1	-0.599215	0.000226186	0.00134176	bulk	DOWN	TACC1	NEU
SLC9A8	-0.599252	1.41748e-06	0.000122109	bulk	DOWN	SLC9A8	NEU
BRSK2	-0.599412	0.000518742	0.00241457	bulk	DOWN	BRSK2	NEU
R3HDM1	-0.599465	1.32887e-05	0.000249962	bulk	DOWN	R3HDM1	NEU
WDR35	-0.599523	7.74534e-06	0.000201922	bulk	DOWN	WDR35	NEU
C11orf65	-0.599802	0.00314099	0.00947238	bulk	DOWN	C11orf65	NEU
TTI1	-0.599922	2.14674e-06	0.000125941	bulk	DOWN	TTI1	NEU
SEC61A2	-0.600018	1.41748e-06	0.000122109	bulk	DOWN	SEC61A2	NEU
FAR1	-0.600033	0.000142018	0.0009793	bulk	DOWN	FAR1	NEU
HDAC9	-0.601412	0.00281761	0.00872287	bulk	DOWN	HDAC9	NEU
ALMS1	-0.601559	3.50142e-06	0.00014866	bulk	DOWN	ALMS1	NEU
NIPBL	-0.602377	1.541e-06	0.00012378	bulk	DOWN	NIPBL	NEU
PCNT	-0.603245	1.23123e-05	0.000242332	bulk	DOWN	PCNT	NEU
IRAK4	-0.603395	0.00331506	0.00988696	bulk	DOWN	IRAK4	NEU
SMC5	-0.603565	0.000430007	0.00210367	bulk	DOWN	SMC5	NEU
MYH10	-0.603631	4.04329e-05	0.000460409	bulk	DOWN	MYH10	NEU
MLXIPL	-0.604127	0.0135238	0.030623	bulk	DOWN	MLXIPL	NEU
UTRN	-0.606216	0.00368981	0.0107143	bulk	DOWN	UTRN	NEU
KCNMB2	-0.606267	0.000518742	0.00241457	bulk	DOWN	KCNMB2	NEU
PRKCA	-0.606578	0.0178098	0.0382725	bulk	DOWN	PRKCA	NEU
KIDINS220	-0.606643	6.62235e-06	0.000186556	bulk	DOWN	KIDINS220	NEU
SDK2	-0.607095	0.0106767	0.025304	bulk	DOWN	SDK2	NEU
GSTO2	-0.608697	1.54676e-05	0.00027041	bulk	DOWN	GSTO2	NEU
KRIT1	-0.608835	5.55475e-07	0.000122109	bulk	DOWN	KRIT1	NEU
RCAN3	-0.608997	0.000333613	0.00175176	bulk	DOWN	RCAN3	NEU
ACAP3	-0.610621	0.0011381	0.00428154	bulk	DOWN	ACAP3	NEU
LCORL	-0.612034	0.00432446	0.012165	bulk	DOWN	LCORL	NEU
DCUN1D4	-0.613075	0.000293387	0.00159844	bulk	DOWN	DCUN1D4	NEU
MAP3K12	-0.61355	6.62235e-06	0.000186556	bulk	DOWN	MAP3K12	NEU
PACS2	-0.614141	1.93848e-05	0.000304019	bulk	DOWN	PACS2	NEU
PATJ	-0.615037	0.000312895	0.00167705	bulk	DOWN	PATJ	NEU
CRTC1	-0.615191	2.42359e-05	0.000344636	bulk	DOWN	CRTC1	NEU
SYT5	-0.615385	0.0117445	0.0274084	bulk	DOWN	SYT5	NEU
ATAD2	-0.615685	0.012313	0.0283897	bulk	DOWN	ATAD2	NEU
SS18L1	-0.618108	2.52969e-06	0.000131899	bulk	DOWN	SS18L1	NEU
USP32	-0.618304	8.53789e-07	0.000122109	bulk	DOWN	USP32	NEU
GATAD1	-0.618619	0.000705449	0.00302976	bulk	DOWN	GATAD1	NEU
SLC23A2	-0.619026	0.00143653	0.00509775	bulk	DOWN	SLC23A2	NEU
ZNF595	-0.61916	0.000624312	0.00276933	bulk	DOWN	ZNF595	NEU
STAG3	-0.619655	0.000551927	0.0025197	bulk	DOWN	STAG3	NEU
MARCHF6	-0.620668	4.34537e-05	0.000480985	bulk	DOWN	MARCHF6	NEU
PRPF38B	-0.621091	0.00410268	0.0117129	bulk	DOWN	PRPF38B	NEU
MARK3	-0.621465	7.14227e-05	0.000622487	bulk	DOWN	MARK3	NEU
TENT2	-0.621609	0.000663728	0.0029073	bulk	DOWN	TENT2	NEU
PPP1R3E	-0.62213	0.00101142	0.00391398	bulk	DOWN	PPP1R3E	NEU
SUPT20H	-0.622257	0.000185579	0.00116976	bulk	DOWN	SUPT20H	NEU
ZNF268	-0.622526	0.00012404	0.000904657	bulk	DOWN	ZNF268	NEU
PI4KA	-0.624056	7.74534e-06	0.000201922	bulk	DOWN	PI4KA	NEU
ZNF117	-0.624188	0.000749596	0.00316224	bulk	DOWN	ZNF117	NEU
VPS8	-0.625508	5.01491e-05	0.000519314	bulk	DOWN	VPS8	NEU
DOCK6	-0.625645	0.000663728	0.0029073	bulk	DOWN	DOCK6	NEU
TNRC6B	-0.625836	1.10144e-06	0.000122109	bulk	DOWN	TNRC6B	NEU
KIF5A	-0.626535	0.000845687	0.00343828	bulk	DOWN	KIF5A	NEU
RNF213-AS1	-0.627024	0.0194822	0.0413136	bulk	DOWN	RNF213-AS1	NEU
ATXN7	-0.627294	1.43387e-05	0.000259056	bulk	DOWN	ATXN7	NEU
VPS53	-0.628066	3.49789e-05	0.000417499	bulk	DOWN	VPS53	NEU
ZMYM2	-0.628403	8.80231e-05	0.00070704	bulk	DOWN	ZMYM2	NEU
MS4A8	-0.628502	0.000587082	0.00264766	bulk	DOWN	MS4A8	NEU
MICAL3	-0.628542	5.01491e-05	0.000519314	bulk	DOWN	MICAL3	NEU
ACACB	-0.628666	0.00480093	0.013236	bulk	DOWN	ACACB	NEU
PRLR	-0.629463	0.00368981	0.0107143	bulk	DOWN	PRLR	NEU
SLC25A46	-0.629601	6.62235e-06	0.000186556	bulk	DOWN	SLC25A46	NEU
AKAP13	-0.630507	8.21218e-05	0.000681748	bulk	DOWN	AKAP13	NEU
USH1C	-0.630689	0.000333613	0.00175176	bulk	DOWN	USH1C	NEU
CAMK2B	-0.630783	0.000132743	0.000938196	bulk	DOWN	CAMK2B	NEU
C8orf44-SGK3	-0.631738	0.000185579	0.00116976	bulk	DOWN	C8orf44-SGK3	NEU
NFASC	-0.631929	0.00025774	0.00146463	bulk	DOWN	NFASC	NEU
PDE8A	-0.632992	0.000897905	0.0035892	bulk	DOWN	PDE8A	NEU
SIN3B	-0.633427	0.000185579	0.00116976	bulk	DOWN	SIN3B	NEU
ARVCF	-0.633677	9.43235e-05	0.00074655	bulk	DOWN	ARVCF	NEU
EVL	-0.633983	0.00721833	0.0183908	bulk	DOWN	EVL	NEU
WDR59	-0.634121	0.000293387	0.00159844	bulk	DOWN	WDR59	NEU
CCDC183	-0.634223	0.00120679	0.00446927	bulk	DOWN	CCDC183	NEU
LDLRAD4	-0.635475	0.00368981	0.0107143	bulk	DOWN	LDLRAD4	NEU
SMCHD1	-0.636185	0.00024148	0.00140721	bulk	DOWN	SMCHD1	NEU
ZNF177	-0.636281	0.00721833	0.0183908	bulk	DOWN	ZNF177	NEU
S100PBP	-0.636391	4.66877e-05	0.00050183	bulk	DOWN	S100PBP	NEU
CBFA2T2	-0.636561	1.32887e-05	0.000249962	bulk	DOWN	CBFA2T2	NEU
EP400	-0.636897	1.79845e-05	0.000289701	bulk	DOWN	EP400	NEU
ZNF529	-0.63731	8.37299e-06	0.000204811	bulk	DOWN	ZNF529	NEU
ZNF292	-0.637715	5.01491e-05	0.000519314	bulk	DOWN	ZNF292	NEU
PTPRS	-0.638056	0.000624312	0.00276933	bulk	DOWN	PTPRS	NEU
TAF1D	-0.638086	0.0222476	0.0461248	bulk	DOWN	TAF1D	NEU
GHR	-0.638176	0.001706	0.00587172	bulk	DOWN	GHR	NEU
NT5DC3	-0.638786	3.76122e-05	0.000441831	bulk	DOWN	NT5DC3	NEU
SRCIN1	-0.638806	8.80231e-05	0.00070704	bulk	DOWN	SRCIN1	NEU
KATNIP	-0.638844	4.11277e-06	0.000151841	bulk	DOWN	KATNIP	NEU
BRD8	-0.63956	5.38528e-05	0.000534393	bulk	DOWN	BRD8	NEU
LSP1P4	-0.640248	0.00532441	0.014366	bulk	DOWN	LSP1P4	NEU
LRRC37B	-0.640563	1.79845e-05	0.000289701	bulk	DOWN	LRRC37B	NEU
NRBP2	-0.641032	0.00923674	0.0225475	bulk	DOWN	NRBP2	NEU
ABCA11P	-0.64139	0.000142018	0.0009793	bulk	DOWN	ABCA11P	NEU
ARFGAP1	-0.641757	0.00686574	0.0176361	bulk	DOWN	ARFGAP1	NEU
TRANK1	-0.641962	7.14227e-05	0.000622487	bulk	DOWN	TRANK1	NEU
GTF2IRD2	-0.641998	0.00025774	0.00146463	bulk	DOWN	GTF2IRD2	NEU
PRUNE2	-0.642187	0.00923674	0.0225475	bulk	DOWN	PRUNE2	NEU
MICAL1	-0.642255	0.000953098	0.00374436	bulk	DOWN	MICAL1	NEU
C2CD3	-0.642285	1.7603e-07	0.000122109	bulk	DOWN	C2CD3	NEU
ZDHHC17	-0.642688	2.25031e-05	0.000329454	bulk	DOWN	ZDHHC17	NEU
EPG5	-0.643605	8.21218e-05	0.000681748	bulk	DOWN	EPG5	NEU
TTC3	-0.644068	0.000953098	0.00374436	bulk	DOWN	TTC3	NEU
LRP1B	-0.644286	0.0106767	0.025304	bulk	DOWN	LRP1B	NEU
ZNF37A	-0.645509	3.79532e-06	0.000151841	bulk	DOWN	ZNF37A	NEU
SPG7	-0.646123	0.00252492	0.00800859	bulk	DOWN	SPG7	NEU
PRPF4B	-0.646712	0.000749596	0.00316224	bulk	DOWN	PRPF4B	NEU
ADAM19	-0.647085	0.000108223	0.000821558	bulk	DOWN	ADAM19	NEU
THOC2	-0.647242	2.30418e-07	0.000122109	bulk	DOWN	THOC2	NEU
GTF2IRD2B	-0.647727	0.00025774	0.00146463	bulk	DOWN	GTF2IRD2B	NEU
ZNF483	-0.647825	0.000518742	0.00241457	bulk	DOWN	ZNF483	NEU
ARFGEF3	-0.648778	4.66877e-05	0.00050183	bulk	DOWN	ARFGEF3	NEU
RET	-0.648831	0.0170219	0.0369128	bulk	DOWN	RET	NEU
RAB28	-0.649052	1.19838e-06	0.000122109	bulk	DOWN	RAB28	NEU
RUBCN	-0.652171	3.22942e-06	0.000144329	bulk	DOWN	RUBCN	NEU
NSD2	-0.652944	0.000132743	0.000938196	bulk	DOWN	NSD2	NEU
TNK2	-0.653832	0.000845687	0.00343828	bulk	DOWN	TNK2	NEU
MLLT6	-0.655497	0.0029753	0.00911137	bulk	DOWN	MLLT6	NEU
MYO19	-0.655698	0.010176	0.0243895	bulk	DOWN	MYO19	NEU
MAP4K5	-0.655776	7.14227e-05	0.000622487	bulk	DOWN	MAP4K5	NEU
PAM	-0.655802	0.0242756	0.0496368	bulk	DOWN	PAM	NEU
ABLIM3	-0.655872	0.000705449	0.00302976	bulk	DOWN	ABLIM3	NEU
ASH1L	-0.656562	3.76122e-05	0.000441831	bulk	DOWN	ASH1L	NEU
XRN1	-0.657025	3.50142e-06	0.00014866	bulk	DOWN	XRN1	NEU
ZNG1A	-0.657506	0.000211804	0.00128466	bulk	DOWN	ZNG1A	NEU
JPX	-0.65784	0.000705449	0.00302976	bulk	DOWN	JPX	NEU
IQSEC3	-0.658615	0.000151902	0.00102719	bulk	DOWN	IQSEC3	NEU
RAPGEF2	-0.658676	3.22942e-06	0.000144329	bulk	DOWN	RAPGEF2	NEU
UHRF2	-0.65932	0.000587082	0.00264766	bulk	DOWN	UHRF2	NEU
JAKMIP2-AS1	-0.659321	5.7589e-05	0.000549841	bulk	DOWN	JAKMIP2-AS1	NEU
VPS41	-0.661229	1.23123e-05	0.000242332	bulk	DOWN	VPS41	NEU
ZBTB40	-0.661326	5.22513e-06	0.000168794	bulk	DOWN	ZBTB40	NEU
EFHC1	-0.661527	1.14046e-05	0.000242103	bulk	DOWN	EFHC1	NEU
PER2	-0.661744	0.000108223	0.000821558	bulk	DOWN	PER2	NEU
MAP3K7	-0.663518	1.8198e-06	0.000125941	bulk	DOWN	MAP3K7	NEU
ARHGEF26	-0.663726	4.04329e-05	0.000460409	bulk	DOWN	ARHGEF26	NEU
MIR548F1	-0.664659	7.14227e-05	0.000622487	bulk	DOWN	MIR548F1	NEU
TAOK1	-0.665475	7.16283e-06	0.000195302	bulk	DOWN	TAOK1	NEU
RALGPS1	-0.66619	0.000293387	0.00159844	bulk	DOWN	RALGPS1	NEU
ZNF587	-0.666191	0.000796297	0.0032938	bulk	DOWN	ZNF587	NEU
SENP5	-0.666302	2.51917e-07	0.000122109	bulk	DOWN	SENP5	NEU
PTBP2	-0.666376	4.34537e-05	0.000480985	bulk	DOWN	PTBP2	NEU
CLOCK	-0.667229	0.000897905	0.0035892	bulk	DOWN	CLOCK	NEU
RGPD8	-0.669558	0.000312895	0.00167705	bulk	DOWN	RGPD8	NEU
JAKMIP2	-0.669673	4.66877e-05	0.00050183	bulk	DOWN	JAKMIP2	NEU
TMOD2	-0.670052	1.66808e-05	0.000280087	bulk	DOWN	TMOD2	NEU
GRB10	-0.671008	0.000355609	0.00183166	bulk	DOWN	GRB10	NEU
TRIM9	-0.671731	0.001706	0.00587172	bulk	DOWN	TRIM9	NEU
CCAR1	-0.672037	0.000226186	0.00134176	bulk	DOWN	CCAR1	NEU
SH3PXD2A	-0.672683	5.01491e-05	0.000519314	bulk	DOWN	SH3PXD2A	NEU
BIVM	-0.6755	0.000185579	0.00116976	bulk	DOWN	BIVM	NEU
OGA	-0.676461	0.000198285	0.00122899	bulk	DOWN	OGA	NEU
JMJD1C	-0.677012	5.38528e-05	0.000534393	bulk	DOWN	JMJD1C	NEU
NIPSNAP3B	-0.677618	0.00107303	0.00409114	bulk	DOWN	NIPSNAP3B	NEU
GARRE1	-0.678253	0.000108223	0.000821558	bulk	DOWN	GARRE1	NEU
N4BP2L1	-0.678591	0.00135581	0.00489609	bulk	DOWN	N4BP2L1	NEU
RGPD3	-0.678609	2.08886e-05	0.000319182	bulk	DOWN	RGPD3	NEU
ZMYND8	-0.678781	9.77716e-06	0.000220971	bulk	DOWN	ZMYND8	NEU
CHD6	-0.678925	2.33067e-06	0.000125941	bulk	DOWN	CHD6	NEU
ATP13A3	-0.678984	1.66808e-05	0.000280087	bulk	DOWN	ATP13A3	NEU
TTC8	-0.679453	6.65813e-05	0.000598728	bulk	DOWN	TTC8	NEU
MYCBP2	-0.679484	0.000551927	0.0025197	bulk	DOWN	MYCBP2	NEU
CEP164	-0.679712	0.000430007	0.00210367	bulk	DOWN	CEP164	NEU
MAP3K4	-0.679918	3.79532e-06	0.000151841	bulk	DOWN	MAP3K4	NEU
ABCC6P2	-0.680133	0.0170219	0.0369128	bulk	DOWN	ABCC6P2	NEU
ICE1	-0.680195	5.65611e-06	0.000176021	bulk	DOWN	ICE1	NEU
INTS10	-0.680332	1.30351e-06	0.000122109	bulk	DOWN	INTS10	NEU
INPP5B	-0.680638	0.00923674	0.0225475	bulk	DOWN	INPP5B	NEU
MIR3064	-0.680693	0.000161869	0.00106683	bulk	DOWN	MIR3064	NEU
GPATCH8	-0.681521	4.11277e-06	0.000151841	bulk	DOWN	GPATCH8	NEU
BRWD1	-0.681775	4.04329e-05	0.000460409	bulk	DOWN	BRWD1	NEU
FRY	-0.682319	4.34537e-05	0.000480985	bulk	DOWN	FRY	NEU
MARK1	-0.682716	1.79845e-05	0.000289701	bulk	DOWN	MARK1	NEU
OFD1	-0.682857	0.000403727	0.00202511	bulk	DOWN	OFD1	NEU
MICALL2	-0.683244	0.00879678	0.0216873	bulk	DOWN	MICALL2	NEU
PLCG1	-0.685799	0.00101142	0.00391398	bulk	DOWN	PLCG1	NEU
MZF1-AS1	-0.686868	0.000705449	0.00302976	bulk	DOWN	MZF1-AS1	NEU
DENND11	-0.68731	7.65958e-05	0.000653207	bulk	DOWN	DENND11	NEU
FSD1L	-0.68766	0.000226186	0.00134176	bulk	DOWN	FSD1L	NEU
IFRD1	-0.688232	0.00480093	0.013236	bulk	DOWN	IFRD1	NEU
TBC1D7	-0.688895	0.000293387	0.00159844	bulk	DOWN	TBC1D7	NEU
AGO4	-0.689765	6.65813e-05	0.000598728	bulk	DOWN	AGO4	NEU
DIP2C	-0.689947	4.04329e-05	0.000460409	bulk	DOWN	DIP2C	NEU
CHFR	-0.690016	0.000333613	0.00175176	bulk	DOWN	CHFR	NEU
RAPGEF4	-0.691426	0.00143653	0.00509775	bulk	DOWN	RAPGEF4	NEU
PTPN3	-0.691555	1.23123e-05	0.000242332	bulk	DOWN	PTPN3	NEU
ZNF718	-0.692693	0.000428701	0.00210367	bulk	DOWN	ZNF718	NEU
LYST	-0.693022	8.37299e-06	0.000204811	bulk	DOWN	LYST	NEU
TRRAP	-0.693685	8.37299e-06	0.000204811	bulk	DOWN	TRRAP	NEU
RGPD6	-0.693963	0.000333613	0.00175176	bulk	DOWN	RGPD6	NEU
ANKZF1	-0.694041	0.00314099	0.00947238	bulk	DOWN	ANKZF1	NEU
MZF1	-0.694878	0.00079409	0.0032938	bulk	DOWN	MZF1	NEU
GGT7	-0.695475	2.42359e-05	0.000344636	bulk	DOWN	GGT7	NEU
BRCA1	-0.695895	0.000312895	0.00167705	bulk	DOWN	BRCA1	NEU
WDFY3	-0.695995	7.83876e-07	0.000122109	bulk	DOWN	WDFY3	NEU
ZNF641	-0.696175	1.23123e-05	0.000242332	bulk	DOWN	ZNF641	NEU
CAMK1D	-0.696356	0.000132743	0.000938196	bulk	DOWN	CAMK1D	NEU
SNAP91	-0.69644	3.02283e-05	0.000388911	bulk	DOWN	SNAP91	NEU
PGM5P2	-0.696818	0.00016243	0.00106683	bulk	DOWN	PGM5P2	NEU
MSI2	-0.697243	7.16283e-06	0.000195302	bulk	DOWN	MSI2	NEU
MAN2C1	-0.697502	0.00505655	0.0138253	bulk	DOWN	MAN2C1	NEU
CCDC183-AS1	-0.697784	0.00619481	0.016252	bulk	DOWN	CCDC183-AS1	NEU
DST	-0.698234	0.000845687	0.00343828	bulk	DOWN	DST	NEU
CHKA	-0.69891	0.00532441	0.014366	bulk	DOWN	CHKA	NEU
NBPF1	-0.699474	0.00101142	0.00391398	bulk	DOWN	NBPF1	NEU
CCDC186	-0.700304	0.000378955	0.00192852	bulk	DOWN	CCDC186	NEU
SGSM2	-0.70156	0.0026676	0.00833221	bulk	DOWN	SGSM2	NEU
TPR	-0.702388	3.48347e-05	0.000417499	bulk	DOWN	TPR	NEU
MDM4	-0.702691	0.000705449	0.00302976	bulk	DOWN	MDM4	NEU
WDR73	-0.702944	0.000705449	0.00302976	bulk	DOWN	WDR73	NEU
RABGEF1	-0.704221	2.14674e-06	0.000125941	bulk	DOWN	RABGEF1	NEU
TP53BP1	-0.70588	3.58967e-07	0.000122109	bulk	DOWN	TP53BP1	NEU
KIAA1217	-0.706203	0.000211804	0.00128466	bulk	DOWN	KIAA1217	NEU
TK2	-0.707261	0.00202128	0.00672328	bulk	DOWN	TK2	NEU
ELP1	-0.707329	4.27809e-07	0.000122109	bulk	DOWN	ELP1	NEU
ZDHHC21	-0.708161	0.000518742	0.00241457	bulk	DOWN	ZDHHC21	NEU
PARP14	-0.708258	0.000551927	0.0025197	bulk	DOWN	PARP14	NEU
SNAP25	-0.70869	0.00024148	0.00140721	bulk	DOWN	SNAP25	NEU
CCDC88A	-0.709774	5.22513e-06	0.000168794	bulk	DOWN	CCDC88A	NEU
PHIP	-0.710313	0.0011381	0.00428154	bulk	DOWN	PHIP	NEU
STXBP5L	-0.711539	2.60951e-05	0.000359049	bulk	DOWN	STXBP5L	NEU
CDK10	-0.711969	0.0203686	0.0428722	bulk	DOWN	CDK10	NEU
CHD1	-0.712434	1.43387e-05	0.000259056	bulk	DOWN	CHD1	NEU
NBEAL2	-0.712473	0.00349787	0.0102826	bulk	DOWN	NBEAL2	NEU
ZNF441	-0.713007	5.22513e-06	0.000168794	bulk	DOWN	ZNF441	NEU
UBA6	-0.713078	1.41748e-06	0.000122109	bulk	DOWN	UBA6	NEU
UNC13B	-0.715229	8.80231e-05	0.00070704	bulk	DOWN	UNC13B	NEU
GSAP	-0.715853	0.00314099	0.00947238	bulk	DOWN	GSAP	NEU
GABBR2	-0.715946	0.00480093	0.013236	bulk	DOWN	GABBR2	NEU
ACIN1	-0.716028	8.80231e-05	0.00070704	bulk	DOWN	ACIN1	NEU
SHC2	-0.718559	0.000749596	0.00316224	bulk	DOWN	SHC2	NEU
TASOR2	-0.71862	2.74496e-06	0.00013711	bulk	DOWN	TASOR2	NEU
RALGAPA2	-0.718666	0.00107303	0.00409114	bulk	DOWN	RALGAPA2	NEU
MED23	-0.718704	7.19494e-07	0.000122109	bulk	DOWN	MED23	NEU
RIIAD1	-0.721393	4.04329e-05	0.000460409	bulk	DOWN	RIIAD1	NEU
PHLDB2	-0.722663	9.04909e-06	0.000211763	bulk	DOWN	PHLDB2	NEU
TRIB1	-0.722762	0.000749596	0.00316224	bulk	DOWN	TRIB1	NEU
CCDC57	-0.723922	0.000705449	0.00302976	bulk	DOWN	CCDC57	NEU
HECTD4	-0.724595	7.73512e-08	0.000122109	bulk	DOWN	HECTD4	NEU
DSCAM	-0.724667	0.000518742	0.00241457	bulk	DOWN	DSCAM	NEU
CELF3	-0.724903	3.49789e-05	0.000417499	bulk	DOWN	CELF3	NEU
CEP290	-0.725314	0.000185579	0.00116976	bulk	DOWN	CEP290	NEU
CLCN5	-0.725727	2.33067e-06	0.000125941	bulk	DOWN	CLCN5	NEU
PRRC2C	-0.72979	8.37299e-06	0.000204811	bulk	DOWN	PRRC2C	NEU
BIRC6	-0.729957	1.43387e-05	0.000259056	bulk	DOWN	BIRC6	NEU
UBR5	-0.730768	2.25031e-05	0.000329454	bulk	DOWN	UBR5	NEU
ALG13	-0.732563	1.66808e-05	0.000280087	bulk	DOWN	ALG13	NEU
IQCJ-SCHIP1	-0.732818	0.000211096	0.00128466	bulk	DOWN	IQCJ-SCHIP1	NEU
KIF5C	-0.733553	0.000198285	0.00122899	bulk	DOWN	KIF5C	NEU
PCGF3	-0.733966	0.000101048	0.000790303	bulk	DOWN	PCGF3	NEU
FAM156A	-0.73398	0.00686574	0.0176361	bulk	DOWN	FAM156A	NEU
UBR4	-0.735261	4.82569e-06	0.000163908	bulk	DOWN	UBR4	NEU
MAGI1	-0.73567	1.93848e-05	0.000304019	bulk	DOWN	MAGI1	NEU
DAAM1	-0.736008	8.37299e-06	0.000204811	bulk	DOWN	DAAM1	NEU
CRLF3	-0.736014	0.000796297	0.0032938	bulk	DOWN	CRLF3	NEU
PPIP5K2	-0.736586	6.65813e-05	0.000598728	bulk	DOWN	PPIP5K2	NEU
RGPD5	-0.737762	0.000211096	0.00128466	bulk	DOWN	RGPD5	NEU
NBEA	-0.737762	0.00191069	0.00640922	bulk	DOWN	NBEA	NEU
LAMB1	-0.737781	0.00589891	0.0156462	bulk	DOWN	LAMB1	NEU
RALGAPA1	-0.738319	2.42359e-05	0.000344636	bulk	DOWN	RALGAPA1	NEU
LMBR1L	-0.738366	0.00331506	0.00988696	bulk	DOWN	LMBR1L	NEU
EPOR	-0.739469	0.010176	0.0243895	bulk	DOWN	EPOR	NEU
PARP6	-0.74032	0.00024148	0.00140721	bulk	DOWN	PARP6	NEU
ZNF618	-0.742669	8.37299e-06	0.000204811	bulk	DOWN	ZNF618	NEU
DCAF16	-0.743485	4.45559e-06	0.000158587	bulk	DOWN	DCAF16	NEU
ANKRD12	-0.745027	6.20516e-05	0.000573615	bulk	DOWN	ANKRD12	NEU
MAPK10	-0.745799	2.42359e-05	0.000344636	bulk	DOWN	MAPK10	NEU
RGS7BP	-0.74635	0.000355609	0.00183166	bulk	DOWN	RGS7BP	NEU
CEP170	-0.747613	6.0567e-07	0.000122109	bulk	DOWN	CEP170	NEU
DIP2A	-0.748022	6.20516e-05	0.000573615	bulk	DOWN	DIP2A	NEU
MIR5047	-0.748181	0.00010783	0.000821558	bulk	DOWN	MIR5047	NEU
NHLRC3	-0.748246	8.21218e-05	0.000681748	bulk	DOWN	NHLRC3	NEU
LONRF2	-0.751433	1.14046e-05	0.000242103	bulk	DOWN	LONRF2	NEU
TMX3	-0.751803	0.000796297	0.0032938	bulk	DOWN	TMX3	NEU
CCDC93	-0.752863	9.04909e-06	0.000211763	bulk	DOWN	CCDC93	NEU
CACNB2	-0.752924	0.000403727	0.00202511	bulk	DOWN	CACNB2	NEU
MEGF11	-0.752987	0.00191069	0.00640922	bulk	DOWN	MEGF11	NEU
ATR	-0.753399	4.11277e-06	0.000151841	bulk	DOWN	ATR	NEU
CLASRP	-0.753431	0.00349787	0.0102826	bulk	DOWN	CLASRP	NEU
CCDC66	-0.755846	2.25031e-05	0.000329454	bulk	DOWN	CCDC66	NEU
GIGYF1	-0.755992	0.0016114	0.00561769	bulk	DOWN	GIGYF1	NEU
TBRG1	-0.756047	0.0242756	0.0496368	bulk	DOWN	TBRG1	NEU
DICER1	-0.756407	6.62235e-06	0.000186556	bulk	DOWN	DICER1	NEU
ZNF44	-0.756432	3.22942e-06	0.000144329	bulk	DOWN	ZNF44	NEU
NINL	-0.757123	1.93848e-05	0.000304019	bulk	DOWN	NINL	NEU
CIBAR1	-0.758098	2.97775e-06	0.000144329	bulk	DOWN	CIBAR1	NEU
ZNG1B	-0.758966	5.38528e-05	0.000534393	bulk	DOWN	ZNG1B	NEU
NAV1	-0.759481	3.22942e-06	0.000144329	bulk	DOWN	NAV1	NEU
CASTOR3P	-0.761534	4.04329e-05	0.000460409	bulk	DOWN	CASTOR3P	NEU
RORA	-0.763208	1.0561e-05	0.000230788	bulk	DOWN	RORA	NEU
SMPD4BP	-0.763782	0.00281761	0.00872287	bulk	DOWN	SMPD4BP	NEU
TET2	-0.76386	4.82569e-06	0.000163908	bulk	DOWN	TET2	NEU
ROCK1	-0.764442	3.02283e-05	0.000388911	bulk	DOWN	ROCK1	NEU
HERC4	-0.765254	2.60951e-05	0.000359049	bulk	DOWN	HERC4	NEU
LAMA5	-0.765981	0.00389127	0.0112063	bulk	DOWN	LAMA5	NEU
PSMA3-AS1	-0.767238	0.00127601	0.00468237	bulk	DOWN	PSMA3-AS1	NEU
SECISBP2	-0.76803	9.04909e-06	0.000211763	bulk	DOWN	SECISBP2	NEU
ZNG1F	-0.769152	0.000226186	0.00134176	bulk	DOWN	ZNG1F	NEU
HOXC4	-0.76956	0.000275023	0.00153065	bulk	DOWN	HOXC4	NEU
MON2	-0.769621	1.30351e-06	0.000122109	bulk	DOWN	MON2	NEU
SYNJ1	-0.769737	5.22513e-06	0.000168794	bulk	DOWN	SYNJ1	NEU
NR2C1	-0.771894	5.38528e-05	0.000534393	bulk	DOWN	NR2C1	NEU
ICA1	-0.77201	5.78147e-05	0.000549841	bulk	DOWN	ICA1	NEU
CCNT2	-0.772737	7.14227e-05	0.000622487	bulk	DOWN	CCNT2	NEU
ZNF692	-0.773049	0.0170219	0.0369128	bulk	DOWN	ZNF692	NEU
PDE4D	-0.778488	3.00878e-07	0.000122109	bulk	DOWN	PDE4D	NEU
SETBP1	-0.779244	3.50142e-06	0.00014866	bulk	DOWN	SETBP1	NEU
DOT1L	-0.780297	0.00025774	0.00146463	bulk	DOWN	DOT1L	NEU
SRRM2	-0.781211	8.80231e-05	0.00070704	bulk	DOWN	SRRM2	NEU
ABCA7	-0.781232	0.00252492	0.00800859	bulk	DOWN	ABCA7	NEU
BSN	-0.781681	1.79845e-05	0.000289701	bulk	DOWN	BSN	NEU
INTS3	-0.782361	0.000115878	0.000862048	bulk	DOWN	INTS3	NEU
ANAPC4	-0.782935	5.38528e-05	0.000534393	bulk	DOWN	ANAPC4	NEU
KIF3A	-0.783506	1.8198e-06	0.000125941	bulk	DOWN	KIF3A	NEU
PLA2G6	-0.783581	0.00331506	0.00988696	bulk	DOWN	PLA2G6	NEU
TTC17	-0.783787	1.23123e-05	0.000242332	bulk	DOWN	TTC17	NEU
ABCA1	-0.783813	0.00238925	0.00768073	bulk	DOWN	ABCA1	NEU
RIMBP2	-0.784738	0.00016243	0.00106683	bulk	DOWN	RIMBP2	NEU
DDX5	-0.786086	2.80895e-05	0.000376045	bulk	DOWN	DDX5	NEU
PEX1	-0.786142	3.22942e-06	0.000144329	bulk	DOWN	PEX1	NEU
PIK3C2A	-0.786336	2.14674e-06	0.000125941	bulk	DOWN	PIK3C2A	NEU
ZNG1C	-0.78697	0.00024148	0.00140721	bulk	DOWN	ZNG1C	NEU
ARHGEF7	-0.787447	0.0026676	0.00833221	bulk	DOWN	ARHGEF7	NEU
AFDN	-0.78768	4.82569e-06	0.000163908	bulk	DOWN	AFDN	NEU
WASH8P	-0.788011	0.00252492	0.00800859	bulk	DOWN	WASH8P	NEU
CYP3A5	-0.788917	0.0079583	0.0199702	bulk	DOWN	CYP3A5	NEU
PIKFYVE	-0.788995	1.19838e-06	0.000122109	bulk	DOWN	PIKFYVE	NEU
ZKSCAN1	-0.789868	0.00331506	0.00988696	bulk	DOWN	ZKSCAN1	NEU
SNED1	-0.790185	0.001706	0.00587172	bulk	DOWN	SNED1	NEU
SLC6A15	-0.79127	0.000333613	0.00175176	bulk	DOWN	SLC6A15	NEU
CCR6	-0.79138	1.79845e-05	0.000289701	bulk	DOWN	CCR6	NEU
DACH2	-0.792187	0.0012793	0.00468237	bulk	DOWN	DACH2	NEU
SLC18A2	-0.792777	0.0141677	0.0317545	bulk	DOWN	SLC18A2	NEU
ZNF700	-0.793177	0.000622516	0.00276933	bulk	DOWN	ZNF700	NEU
SLC25A36	-0.793926	7.65958e-05	0.000653207	bulk	DOWN	SLC25A36	NEU
NLRC5	-0.794491	0.00025774	0.00146463	bulk	DOWN	NLRC5	NEU
APPL2	-0.796092	0.00025774	0.00146463	bulk	DOWN	APPL2	NEU
NSUN5P2	-0.796293	0.00432446	0.012165	bulk	DOWN	NSUN5P2	NEU
PAN3	-0.796964	0.000198285	0.00122899	bulk	DOWN	PAN3	NEU
EBF4	-0.797429	0.000663728	0.0029073	bulk	DOWN	EBF4	NEU
TEAD1	-0.797432	2.60951e-05	0.000359049	bulk	DOWN	TEAD1	NEU
VPS13B	-0.797806	2.33067e-06	0.000125941	bulk	DOWN	VPS13B	NEU
SETD5	-0.798205	1.19838e-06	0.000122109	bulk	DOWN	SETD5	NEU
DYNC2I1	-0.79828	7.83876e-07	0.000122109	bulk	DOWN	DYNC2I1	NEU
PRPF3	-0.798405	0.00101142	0.00391398	bulk	DOWN	PRPF3	NEU
BPTF	-0.798798	1.30351e-06	0.000122109	bulk	DOWN	BPTF	NEU
SPATA13	-0.800345	7.16283e-06	0.000195302	bulk	DOWN	SPATA13	NEU
PHF20L1	-0.801012	2.14674e-06	0.000125941	bulk	DOWN	PHF20L1	NEU
BAZ2B	-0.802656	1.14046e-05	0.000242103	bulk	DOWN	BAZ2B	NEU
ABCD4	-0.803612	0.000551927	0.0025197	bulk	DOWN	ABCD4	NEU
GPR179	-0.803874	0.00879678	0.0216873	bulk	DOWN	GPR179	NEU
MAP6	-0.805286	8.80231e-05	0.00070704	bulk	DOWN	MAP6	NEU
GTF2H2C	-0.805582	8.21218e-05	0.000681748	bulk	DOWN	GTF2H2C	NEU
STX16	-0.806576	0.000101048	0.000790303	bulk	DOWN	STX16	NEU
IFT80	-0.80708	2.80895e-05	0.000376045	bulk	DOWN	IFT80	NEU
U2SURP	-0.807499	1.19838e-06	0.000122109	bulk	DOWN	U2SURP	NEU
DOP1A	-0.808113	0.000198285	0.00122899	bulk	DOWN	DOP1A	NEU
HERC1	-0.809251	1.19838e-06	0.000122109	bulk	DOWN	HERC1	NEU
ST18	-0.809585	0.000151902	0.00102719	bulk	DOWN	ST18	NEU
WASH2P	-0.810034	0.00107303	0.00409114	bulk	DOWN	WASH2P	NEU
ZDBF2	-0.811518	4.11277e-06	0.000151841	bulk	DOWN	ZDBF2	NEU
RBM39	-0.811826	0.0016114	0.00561769	bulk	DOWN	RBM39	NEU
AGBL4	-0.812834	1.14046e-05	0.000242103	bulk	DOWN	AGBL4	NEU
ZFR2	-0.814333	0.000487424	0.0023178	bulk	DOWN	ZFR2	NEU
ABLIM2	-0.814922	1.01206e-06	0.000122109	bulk	DOWN	ABLIM2	NEU
REV1	-0.817137	1.32887e-05	0.000249962	bulk	DOWN	REV1	NEU
SCN3A	-0.818044	0.000749596	0.00316224	bulk	DOWN	SCN3A	NEU
HIPK2	-0.81898	0.00797264	0.0199702	bulk	DOWN	HIPK2	NEU
ZNF763	-0.8197	0.00016243	0.00106683	bulk	DOWN	ZNF763	NEU
ZSCAN25	-0.821243	0.00686574	0.0176361	bulk	DOWN	ZSCAN25	NEU
ZNF711	-0.821247	0.0012793	0.00468237	bulk	DOWN	ZNF711	NEU
GRIA3	-0.821566	0.000705449	0.00302976	bulk	DOWN	GRIA3	NEU
DLG5	-0.821751	9.77716e-06	0.000220971	bulk	DOWN	DLG5	NEU
SGK2	-0.823568	0.000355609	0.00183166	bulk	DOWN	SGK2	NEU
SMC6	-0.824098	0.00120679	0.00446927	bulk	DOWN	SMC6	NEU
USP34	-0.825471	7.74534e-06	0.000201922	bulk	DOWN	USP34	NEU
TBXAS1	-0.826387	0.000897905	0.0035892	bulk	DOWN	TBXAS1	NEU
DMXL1	-0.826663	1.97679e-06	0.000125941	bulk	DOWN	DMXL1	NEU
ATOSA	-0.826798	3.22942e-06	0.000144329	bulk	DOWN	ATOSA	NEU
ARMCX4	-0.827937	4.34537e-05	0.000480985	bulk	DOWN	ARMCX4	NEU
KSR2	-0.828658	8.37299e-06	0.000204811	bulk	DOWN	KSR2	NEU
MACF1	-0.829089	9.04909e-06	0.000211763	bulk	DOWN	MACF1	NEU
SLC24A5	-0.829597	0.000142018	0.0009793	bulk	DOWN	SLC24A5	NEU
SRSF5	-0.830355	0.00923674	0.0225475	bulk	DOWN	SRSF5	NEU
RTEL1	-0.830397	0.0135024	0.030623	bulk	DOWN	RTEL1	NEU
PITPNM2	-0.830402	5.78147e-05	0.000549841	bulk	DOWN	PITPNM2	NEU
ZNF540	-0.83163	1.23123e-05	0.000242332	bulk	DOWN	ZNF540	NEU
ENOSF1	-0.831689	0.00368981	0.0107143	bulk	DOWN	ENOSF1	NEU
CLEC18C	-0.832165	0.0026676	0.00833221	bulk	DOWN	CLEC18C	NEU
YTHDC2	-0.834401	1.41748e-06	0.000122109	bulk	DOWN	YTHDC2	NEU
KIAA0408	-0.834629	0.00504649	0.0138253	bulk	DOWN	KIAA0408	NEU
PNN	-0.835202	0.00191069	0.00640922	bulk	DOWN	PNN	NEU
ATM	-0.835687	0.000705449	0.00302976	bulk	DOWN	ATM	NEU
RELCH	-0.838282	9.43235e-05	0.00074655	bulk	DOWN	RELCH	NEU
ZNF326	-0.838451	6.62235e-06	0.000186556	bulk	DOWN	ZNF326	NEU
FAM135B	-0.839373	0.00923674	0.0225475	bulk	DOWN	FAM135B	NEU
TUT4	-0.840193	6.60222e-07	0.000122109	bulk	DOWN	TUT4	NEU
ZNF69	-0.841272	5.38528e-05	0.000534393	bulk	DOWN	ZNF69	NEU
WHRN	-0.841629	0.00024148	0.00140721	bulk	DOWN	WHRN	NEU
FAM47E	-0.842685	3.76122e-05	0.000441831	bulk	DOWN	FAM47E	NEU
UNC13A	-0.843798	2.25031e-05	0.000329454	bulk	DOWN	UNC13A	NEU
BOD1L1	-0.844031	2.74496e-06	0.00013711	bulk	DOWN	BOD1L1	NEU
SHTN1	-0.844909	2.14674e-06	0.000125941	bulk	DOWN	SHTN1	NEU
TPCN1	-0.848224	0.000226186	0.00134176	bulk	DOWN	TPCN1	NEU
RNF213	-0.848936	0.00135581	0.00489609	bulk	DOWN	RNF213	NEU
ORM1	-0.85271	0.00135581	0.00489609	bulk	DOWN	ORM1	NEU
CADPS	-0.852773	3.02283e-05	0.000388911	bulk	DOWN	CADPS	NEU
DNAAF9	-0.853404	2.14674e-06	0.000125941	bulk	DOWN	DNAAF9	NEU
DYNC2H1	-0.853487	0.00349787	0.0102826	bulk	DOWN	DYNC2H1	NEU
TSC1	-0.853982	3.76122e-05	0.000441831	bulk	DOWN	TSC1	NEU
SLC7A2	-0.854284	2.80895e-05	0.000376045	bulk	DOWN	SLC7A2	NEU
C2CD5	-0.854962	4.45559e-06	0.000158587	bulk	DOWN	C2CD5	NEU
AP1G2	-0.85955	0.0141677	0.0317545	bulk	DOWN	AP1G2	NEU
PCLO	-0.860502	0.000132743	0.000938196	bulk	DOWN	PCLO	NEU
FBXW7	-0.860517	0.00012404	0.000904657	bulk	DOWN	FBXW7	NEU
TRIO	-0.861525	5.22513e-06	0.000168794	bulk	DOWN	TRIO	NEU
MCOLN3	-0.864202	2.52969e-06	0.000131899	bulk	DOWN	MCOLN3	NEU
CACNA2D1	-0.865092	1.43387e-05	0.000259056	bulk	DOWN	CACNA2D1	NEU
TRPC1	-0.865591	1.541e-06	0.00012378	bulk	DOWN	TRPC1	NEU
CELSR3	-0.867098	2.08886e-05	0.000319182	bulk	DOWN	CELSR3	NEU
KLHL29	-0.86967	2.08886e-05	0.000319182	bulk	DOWN	KLHL29	NEU
CREBZF	-0.873924	0.00349787	0.0102826	bulk	DOWN	CREBZF	NEU
WDR19	-0.875873	2.42359e-05	0.000344636	bulk	DOWN	WDR19	NEU
ODF2L	-0.877806	5.65611e-06	0.000176021	bulk	DOWN	ODF2L	NEU
SRRM3	-0.879099	5.38528e-05	0.000534393	bulk	DOWN	SRRM3	NEU
RGPD1	-0.879202	0.000487424	0.0023178	bulk	DOWN	RGPD1	NEU
ZNF789	-0.879927	5.78147e-05	0.000549841	bulk	DOWN	ZNF789	NEU
AKAP9	-0.882481	2.97775e-06	0.000144329	bulk	DOWN	AKAP9	NEU
TSPOAP1	-0.883651	0.00016243	0.00106683	bulk	DOWN	TSPOAP1	NEU
STK36	-0.885585	1.43387e-05	0.000259056	bulk	DOWN	STK36	NEU
RIMKLB	-0.888868	0.000132743	0.000938196	bulk	DOWN	RIMKLB	NEU
ZNF655	-0.889117	1.10144e-06	0.000122109	bulk	DOWN	ZNF655	NEU
SERPINA12	-0.891335	0.00331506	0.00988696	bulk	DOWN	SERPINA12	NEU
TTLL3	-0.891755	0.0122931	0.0283897	bulk	DOWN	TTLL3	NEU
UNC79	-0.891785	5.01491e-05	0.000519314	bulk	DOWN	UNC79	NEU
NAV2	-0.892313	4.66877e-05	0.00050183	bulk	DOWN	NAV2	NEU
PER3	-0.892335	0.00025774	0.00146463	bulk	DOWN	PER3	NEU
CACNA1B	-0.897074	0.000457876	0.0022109	bulk	DOWN	CACNA1B	NEU
NFAT5	-0.898335	3.02283e-05	0.000388911	bulk	DOWN	NFAT5	NEU
REV3L	-0.899145	7.74534e-06	0.000201922	bulk	DOWN	REV3L	NEU
MATCAP1	-0.899149	0.000132743	0.000938196	bulk	DOWN	MATCAP1	NEU
THBS1	-0.899785	0.0141677	0.0317545	bulk	DOWN	THBS1	NEU
CSMD2	-0.89989	0.000355609	0.00183166	bulk	DOWN	CSMD2	NEU
TUB	-0.901409	0.00202128	0.00672328	bulk	DOWN	TUB	NEU
RIMS2	-0.901588	6.62235e-06	0.000186556	bulk	DOWN	RIMS2	NEU
CNTRL	-0.903705	2.52969e-06	0.000131899	bulk	DOWN	CNTRL	NEU
SOGA3	-0.906335	0.000897905	0.0035892	bulk	DOWN	SOGA3	NEU
POGZ	-0.906494	1.23123e-05	0.000242332	bulk	DOWN	POGZ	NEU
PAXBP1-AS1	-0.906749	7.65958e-05	0.000653207	bulk	DOWN	PAXBP1-AS1	NEU
PRPF39	-0.906981	0.00101142	0.00391398	bulk	DOWN	PRPF39	NEU
ANKRD18A	-0.907802	0.00349787	0.0102826	bulk	DOWN	ANKRD18A	NEU
HPR	-0.909439	0.00649432	0.0169758	bulk	DOWN	HPR	NEU
ZRANB2	-0.910144	0.00101142	0.00391398	bulk	DOWN	ZRANB2	NEU
VWA5B2	-0.910368	5.01491e-05	0.000519314	bulk	DOWN	VWA5B2	NEU
TTN	-0.911617	0.00368981	0.0107143	bulk	DOWN	TTN	NEU
CCP110	-0.912419	7.05018e-08	0.000122109	bulk	DOWN	CCP110	NEU
TRO	-0.913574	0.000211804	0.00128466	bulk	DOWN	TRO	NEU
SELENOO	-0.915232	0.000293387	0.00159844	bulk	DOWN	SELENOO	NEU
PPWD1	-0.915498	3.49789e-05	0.000417499	bulk	DOWN	PPWD1	NEU
RAB3B	-0.915754	0.00314099	0.00947238	bulk	DOWN	RAB3B	NEU
GTF2H2	-0.915909	0.000333613	0.00175176	bulk	DOWN	GTF2H2	NEU
FAM193B	-0.916478	0.001706	0.00587172	bulk	DOWN	FAM193B	NEU
RASAL2	-0.9166	1.0561e-05	0.000230788	bulk	DOWN	RASAL2	NEU
ZNF10	-0.917085	0.000123597	0.000904657	bulk	DOWN	ZNF10	NEU
CYP2E1	-0.917615	0.000749596	0.00316224	bulk	DOWN	CYP2E1	NEU
SLC5A9	-0.920481	0.00252492	0.00800859	bulk	DOWN	SLC5A9	NEU
PLCB4	-0.92058	7.65958e-05	0.000653207	bulk	DOWN	PLCB4	NEU
CALCR	-0.921925	0.00331506	0.00988696	bulk	DOWN	CALCR	NEU
TUBGCP6	-0.922078	0.000518742	0.00241457	bulk	DOWN	TUBGCP6	NEU
LINC03006	-0.922221	3.02283e-05	0.000388911	bulk	DOWN	LINC03006	NEU
SENP7	-0.924665	3.00878e-07	0.000122109	bulk	DOWN	SENP7	NEU
RASA1	-0.925267	1.8198e-06	0.000125941	bulk	DOWN	RASA1	NEU
RBM33	-0.928085	2.33067e-06	0.000125941	bulk	DOWN	RBM33	NEU
CPEB4	-0.928221	1.43387e-05	0.000259056	bulk	DOWN	CPEB4	NEU
MYO5C	-0.928544	0.000430007	0.00210367	bulk	DOWN	MYO5C	NEU
MBD3L3	-0.930002	0.0222476	0.0461248	bulk	DOWN	MBD3L3	NEU
ATG2B	-0.930374	5.22513e-06	0.000168794	bulk	DOWN	ATG2B	NEU
ARHGAP33	-0.932362	0.000749596	0.00316224	bulk	DOWN	ARHGAP33	NEU
SUGP2	-0.934815	3.28686e-07	0.000122109	bulk	DOWN	SUGP2	NEU
MYT1	-0.935795	4.45559e-06	0.000158587	bulk	DOWN	MYT1	NEU
TMEM74B	-0.937539	0.000293387	0.00159844	bulk	DOWN	TMEM74B	NEU
RGL3	-0.93774	0.00226028	0.00735364	bulk	DOWN	RGL3	NEU
ZNF83	-0.939327	0.0178098	0.0382725	bulk	DOWN	ZNF83	NEU
TRIM46	-0.93954	2.08886e-05	0.000319182	bulk	DOWN	TRIM46	NEU
CCDC14	-0.939613	0.0135238	0.030623	bulk	DOWN	CCDC14	NEU
TNRC6A	-0.940755	2.33067e-06	0.000125941	bulk	DOWN	TNRC6A	NEU
AKT2	-0.943844	3.25213e-05	0.000404407	bulk	DOWN	AKT2	NEU
ZNF557	-0.948038	0.000275023	0.00153065	bulk	DOWN	ZNF557	NEU
CES4A	-0.950594	0.00107303	0.00409114	bulk	DOWN	CES4A	NEU
ABCC5	-0.950619	0.000587082	0.00264766	bulk	DOWN	ABCC5	NEU
DGKH	-0.951087	1.97679e-06	0.000125941	bulk	DOWN	DGKH	NEU
RBM6	-0.953769	0.000333613	0.00175176	bulk	DOWN	RBM6	NEU
ZNF862	-0.953969	3.02283e-05	0.000388911	bulk	DOWN	ZNF862	NEU
NIN	-0.954702	1.0561e-05	0.000230788	bulk	DOWN	NIN	NEU
CKLF	-0.956102	0.00330788	0.00988696	bulk	DOWN	CKLF	NEU
VPS13C	-0.957589	2.33067e-06	0.000125941	bulk	DOWN	VPS13C	NEU
ADGRV1	-0.958272	6.20516e-05	0.000573615	bulk	DOWN	ADGRV1	NEU
PNPLA7	-0.961263	0.00238925	0.00768073	bulk	DOWN	PNPLA7	NEU
CYP2C19	-0.961606	0.00191069	0.00640922	bulk	DOWN	CYP2C19	NEU
DNHD1	-0.961621	0.000333613	0.00175176	bulk	DOWN	DNHD1	NEU
SMG1	-0.962675	5.01491e-05	0.000519314	bulk	DOWN	SMG1	NEU
PCNX2	-0.96657	1.54676e-05	0.00027041	bulk	DOWN	PCNX2	NEU
PTPRT	-0.970176	0.001706	0.00587172	bulk	DOWN	PTPRT	NEU
MAST4	-0.970713	6.0567e-07	0.000122109	bulk	DOWN	MAST4	NEU
ATP13A5	-0.970736	0.00410268	0.0117129	bulk	DOWN	ATP13A5	NEU
HS6ST3	-0.972448	0.000749596	0.00316224	bulk	DOWN	HS6ST3	NEU
RIC3	-0.977339	5.78147e-05	0.000549841	bulk	DOWN	RIC3	NEU
DMXL2	-0.978906	5.22513e-06	0.000168794	bulk	DOWN	DMXL2	NEU
N4BP2L2	-0.98012	0.000142018	0.0009793	bulk	DOWN	N4BP2L2	NEU
DPY19L2	-0.980926	0.0029753	0.00911137	bulk	DOWN	DPY19L2	NEU
ZNF518A	-0.984299	5.01491e-05	0.000519314	bulk	DOWN	ZNF518A	NEU
ALPK3	-0.986911	3.02283e-05	0.000388911	bulk	DOWN	ALPK3	NEU
RUFY3	-0.988408	1.541e-06	0.00012378	bulk	DOWN	RUFY3	NEU
SPAG9	-0.988832	1.10144e-06	0.000122109	bulk	DOWN	SPAG9	NEU
TF	-0.989545	0.00410268	0.0117129	bulk	DOWN	TF	NEU
ZNF337	-0.991787	7.14227e-05	0.000622487	bulk	DOWN	ZNF337	NEU
EML6	-0.991943	0.000142018	0.0009793	bulk	DOWN	EML6	NEU
CEP95	-0.994823	4.04329e-05	0.000460409	bulk	DOWN	CEP95	NEU
BDP1	-0.996145	2.14674e-06	0.000125941	bulk	DOWN	BDP1	NEU
LRRC37A3	-0.999329	2.80895e-05	0.000376045	bulk	DOWN	LRRC37A3	NEU
EML5	-1.00091	3.22942e-06	0.000144329	bulk	DOWN	EML5	NEU
MAPK8IP3	-1.00388	0.000487424	0.0023178	bulk	DOWN	MAPK8IP3	NEU
D2HGDH	-1.00708	0.000845687	0.00343828	bulk	DOWN	D2HGDH	NEU
NALCN	-1.00754	0.0011381	0.00428154	bulk	DOWN	NALCN	NEU
BLTP1	-1.01385	1.8198e-06	0.000125941	bulk	DOWN	BLTP1	NEU
PLXNB1	-1.01506	4.04329e-05	0.000460409	bulk	DOWN	PLXNB1	NEU
NPHP3	-1.01717	0.000551927	0.0025197	bulk	DOWN	NPHP3	NEU
LINC01089	-1.01765	0.000378955	0.00192852	bulk	DOWN	LINC01089	NEU
TCERG1	-1.0182	4.11277e-06	0.000151841	bulk	DOWN	TCERG1	NEU
FAM184A	-1.0218	4.45559e-06	0.000158587	bulk	DOWN	FAM184A	NEU
UBN2	-1.02506	7.83876e-07	0.000122109	bulk	DOWN	UBN2	NEU
IL18R1	-1.02622	0.00686574	0.0176361	bulk	DOWN	IL18R1	NEU
TRA2A	-1.02941	6.20516e-05	0.000573615	bulk	DOWN	TRA2A	NEU
NCAM1	-1.03008	0.0155372	0.0343448	bulk	DOWN	NCAM1	NEU
LINC01091	-1.03153	2.74496e-06	0.00013711	bulk	DOWN	LINC01091	NEU
HNRNPH1	-1.03514	9.77716e-06	0.000220971	bulk	DOWN	HNRNPH1	NEU
KHDC4	-1.0361	0.000333613	0.00175176	bulk	DOWN	KHDC4	NEU
COL5A2	-1.03673	0.00107303	0.00409114	bulk	DOWN	COL5A2	NEU
OGT	-1.03772	0.00559412	0.0150073	bulk	DOWN	OGT	NEU
ZNF814	-1.04382	1.54676e-05	0.00027041	bulk	DOWN	ZNF814	NEU
CCDC158	-1.04635	0.000457876	0.0022109	bulk	DOWN	CCDC158	NEU
TENT4A	-1.04916	7.19494e-07	0.000122109	bulk	DOWN	TENT4A	NEU
MROH7	-1.04929	0.00685296	0.0176361	bulk	DOWN	MROH7	NEU
AMY2A	-1.05272	0.000355609	0.00183166	bulk	DOWN	AMY2A	NEU
ICA1L	-1.0549	1.23123e-05	0.000242332	bulk	DOWN	ICA1L	NEU
CACNA1C	-1.05843	4.11277e-06	0.000151841	bulk	DOWN	CACNA1C	NEU
FGG	-1.0589	0.0213967	0.0447509	bulk	DOWN	FGG	NEU
PAN2	-1.06091	9.43235e-05	0.00074655	bulk	DOWN	PAN2	NEU
WASHC1	-1.06632	0.000796297	0.0032938	bulk	DOWN	WASHC1	NEU
RBM25	-1.07322	0.000108223	0.000821558	bulk	DOWN	RBM25	NEU
AASS	-1.07349	0.000132743	0.000938196	bulk	DOWN	AASS	NEU
CLK4	-1.08521	5.01491e-05	0.000519314	bulk	DOWN	CLK4	NEU
PKD1	-1.09104	0.000312895	0.00167705	bulk	DOWN	PKD1	NEU
FNBP4	-1.09116	1.23123e-05	0.000242332	bulk	DOWN	FNBP4	NEU
ZFC3H1	-1.09118	1.66808e-05	0.000280087	bulk	DOWN	ZFC3H1	NEU
ZNF397	-1.09199	1.32887e-05	0.000249962	bulk	DOWN	ZNF397	NEU
XIST	-1.0942	0.0186282	0.0396897	bulk	DOWN	XIST	NEU
CEP126	-1.09466	0.00101142	0.00391398	bulk	DOWN	CEP126	NEU
MYEF2	-1.10641	5.01491e-05	0.000519314	bulk	DOWN	MYEF2	NEU
MYT1L	-1.10692	0.000142018	0.0009793	bulk	DOWN	MYT1L	NEU
CENATAC	-1.11585	9.43235e-05	0.00074655	bulk	DOWN	CENATAC	NEU
TPH1	-1.11638	0.000663728	0.0029073	bulk	DOWN	TPH1	NEU
GUSBP11	-1.11741	0.00620662	0.016252	bulk	DOWN	GUSBP11	NEU
BTAF1	-1.11882	4.11277e-06	0.000151841	bulk	DOWN	BTAF1	NEU
NAIP	-1.12067	0.000226186	0.00134176	bulk	DOWN	NAIP	NEU
TARBP1	-1.12143	1.66808e-05	0.000280087	bulk	DOWN	TARBP1	NEU
DNAH1	-1.12163	8.37299e-06	0.000204811	bulk	DOWN	DNAH1	NEU
FTX	-1.12198	0.000108223	0.000821558	bulk	DOWN	FTX	NEU
AGAP5	-1.12477	2.25031e-05	0.000329454	bulk	DOWN	AGAP5	NEU
TMEM161B-DT	-1.13352	7.74534e-06	0.000201922	bulk	DOWN	TMEM161B-DT	NEU
CROCCP3	-1.13654	6.12101e-06	0.000181916	bulk	DOWN	CROCCP3	NEU
ZNF37BP	-1.13683	1.0561e-05	0.000230788	bulk	DOWN	ZNF37BP	NEU
VPS13A	-1.13943	4.11277e-06	0.000151841	bulk	DOWN	VPS13A	NEU
AMY1A	-1.1426	0.000312895	0.00167705	bulk	DOWN	AMY1A	NEU
NFKBIZ	-1.14638	0.00213772	0.00701248	bulk	DOWN	NFKBIZ	NEU
CLASP2	-1.15511	4.11277e-06	0.000151841	bulk	DOWN	CLASP2	NEU
ZSCAN30	-1.15572	8.21218e-05	0.000681748	bulk	DOWN	ZSCAN30	NEU
ABCA5	-1.16248	6.12101e-06	0.000181916	bulk	DOWN	ABCA5	NEU
RBM5	-1.16941	0.000333613	0.00175176	bulk	DOWN	RBM5	NEU
CACNA1D	-1.17122	6.12101e-06	0.000181916	bulk	DOWN	CACNA1D	NEU
SRSF11	-1.17245	2.42359e-05	0.000344636	bulk	DOWN	SRSF11	NEU
HERC2P9	-1.18154	0.00143653	0.00509775	bulk	DOWN	HERC2P9	NEU
HOOK3	-1.18815	0.000151902	0.00102719	bulk	DOWN	HOOK3	NEU
RNPC3	-1.19283	0.000185579	0.00116976	bulk	DOWN	RNPC3	NEU
PAXBP1	-1.19498	5.78147e-05	0.000549841	bulk	DOWN	PAXBP1	NEU
GK5	-1.19987	5.38528e-05	0.000534393	bulk	DOWN	GK5	NEU
TTC14	-1.20311	0.00143653	0.00509775	bulk	DOWN	TTC14	NEU
CCNL1	-1.20654	0.0012793	0.00468237	bulk	DOWN	CCNL1	NEU
WSB1	-1.20881	0.00107303	0.00409114	bulk	DOWN	WSB1	NEU
CAPRIN2	-1.2113	0.000151902	0.00102719	bulk	DOWN	CAPRIN2	NEU
TXNL4B	-1.21179	0.00532441	0.014366	bulk	DOWN	TXNL4B	NEU
ECHDC2	-1.21379	0.000275023	0.00153065	bulk	DOWN	ECHDC2	NEU
TBC1D3B	-1.22002	4.34537e-05	0.000480985	bulk	DOWN	TBC1D3B	NEU
CLK1	-1.22172	0.00879678	0.0216873	bulk	DOWN	CLK1	NEU
MYSM1	-1.22361	1.8198e-06	0.000125941	bulk	DOWN	MYSM1	NEU
AGAP4	-1.22985	1.66808e-05	0.000280087	bulk	DOWN	AGAP4	NEU
LENG8	-1.23539	0.000355609	0.00183166	bulk	DOWN	LENG8	NEU
MYOM3	-1.23583	0.00560503	0.0150073	bulk	DOWN	MYOM3	NEU
CFAP44	-1.24123	0.000151902	0.00102719	bulk	DOWN	CFAP44	NEU
ARMH1	-1.25185	5.01491e-05	0.000519314	bulk	DOWN	ARMH1	NEU
PLEKHH1	-1.2649	0.000115878	0.000862048	bulk	DOWN	PLEKHH1	NEU
MIR3936HG	-1.26789	1.43387e-05	0.000259056	bulk	DOWN	MIR3936HG	NEU
SREK1	-1.27378	4.66844e-07	0.000122109	bulk	DOWN	SREK1	NEU
SHANK3	-1.27636	1.46909e-07	0.000122109	bulk	DOWN	SHANK3	NEU
GRIA2	-1.27988	0.000226186	0.00134176	bulk	DOWN	GRIA2	NEU
PAK3	-1.2818	2.25031e-05	0.000329454	bulk	DOWN	PAK3	NEU
TBC1D3C	-1.28361	0.000517208	0.00241457	bulk	DOWN	TBC1D3C	NEU
WASH5P	-1.28742	0.00012404	0.000904657	bulk	DOWN	WASH5P	NEU
CSAD	-1.28846	6.20516e-05	0.000573615	bulk	DOWN	CSAD	NEU
AHSA2P	-1.28852	0.00349787	0.0102826	bulk	DOWN	AHSA2P	NEU
AHI1	-1.29851	1.541e-06	0.00012378	bulk	DOWN	AHI1	NEU
UNC80	-1.30247	1.97679e-06	0.000125941	bulk	DOWN	UNC80	NEU
NPIPB5	-1.30666	0.0141677	0.0317545	bulk	DOWN	NPIPB5	NEU
TBC1D3	-1.30846	2.25031e-05	0.000329454	bulk	DOWN	TBC1D3	NEU
TBC1D3L	-1.30846	2.25031e-05	0.000329454	bulk	DOWN	TBC1D3L	NEU
ANKRD10	-1.3172	5.38528e-05	0.000534393	bulk	DOWN	ANKRD10	NEU
WDR17	-1.33334	3.79532e-06	0.000151841	bulk	DOWN	WDR17	NEU
CCNL2	-1.33649	0.00797264	0.0199702	bulk	DOWN	CCNL2	NEU
LUC7L3	-1.33836	0.00025774	0.00146463	bulk	DOWN	LUC7L3	NEU
ZNF780B	-1.34293	4.27809e-07	0.000122109	bulk	DOWN	ZNF780B	NEU
ARGLU1	-1.34443	0.0026676	0.00833221	bulk	DOWN	ARGLU1	NEU
ACSL1	-1.34842	0.00532441	0.014366	bulk	DOWN	ACSL1	NEU
CCL3L1	-1.35481	0.000332563	0.00175176	bulk	DOWN	CCL3L1	NEU
CCL3L3	-1.35481	0.000332563	0.00175176	bulk	DOWN	CCL3L3	NEU
SLC38A11	-1.3691	0.0012793	0.00468237	bulk	DOWN	SLC38A11	NEU
NPIPB13	-1.37715	0.00589891	0.0156462	bulk	DOWN	NPIPB13	NEU
DDX17	-1.39235	1.23123e-05	0.000242332	bulk	DOWN	DDX17	NEU
PPFIBP1	-1.39479	6.62235e-06	0.000186556	bulk	DOWN	PPFIBP1	NEU
PNISR	-1.39517	6.65813e-05	0.000598728	bulk	DOWN	PNISR	NEU
TRPC7	-1.39821	1.54676e-05	0.00027041	bulk	DOWN	TRPC7	NEU
HP	-1.40334	0.0028066	0.00872287	bulk	DOWN	HP	NEU
TBC1D3H	-1.40387	0.00055031	0.0025197	bulk	DOWN	TBC1D3H	NEU
PFKFB1	-1.40712	5.01491e-05	0.000519314	bulk	DOWN	PFKFB1	NEU
CACNA1A	-1.42338	3.49789e-05	0.000417499	bulk	DOWN	CACNA1A	NEU
TTLL6	-1.45611	4.34537e-05	0.000480985	bulk	DOWN	TTLL6	NEU
CFAP70	-1.45866	7.74534e-06	0.000201922	bulk	DOWN	CFAP70	NEU
ANKRD36B	-1.46314	1.23123e-05	0.000242332	bulk	DOWN	ANKRD36B	NEU
BEAN1	-1.46443	2.60951e-05	0.000359049	bulk	DOWN	BEAN1	NEU
GIPR	-1.47188	1.66808e-05	0.000280087	bulk	DOWN	GIPR	NEU
SLC34A3	-1.48461	7.74534e-06	0.000201922	bulk	DOWN	SLC34A3	NEU
STK32A	-1.49635	1.19838e-06	0.000122109	bulk	DOWN	STK32A	NEU
AMY2B	-1.49753	8.80231e-05	0.00070704	bulk	DOWN	AMY2B	NEU
GOLGA8A	-1.49819	0.00969622	0.0234667	bulk	DOWN	GOLGA8A	NEU
TIA1	-1.50994	6.20516e-05	0.000573615	bulk	DOWN	TIA1	NEU
GOLGA8B	-1.53398	0.00432446	0.012165	bulk	DOWN	GOLGA8B	NEU
NPIPA1	-1.53965	2.42359e-05	0.000344636	bulk	DOWN	NPIPA1	NEU
AGAP9	-1.54222	7.14227e-05	0.000622487	bulk	DOWN	AGAP9	NEU
CDHR3	-1.59471	2.60951e-05	0.000359049	bulk	DOWN	CDHR3	NEU
ZIM2	-1.62315	0.00331506	0.00988696	bulk	DOWN	ZIM2	NEU
NPIPB3	-1.62499	0.000624312	0.00276933	bulk	DOWN	NPIPB3	NEU
ANKRD36	-1.64158	1.23123e-05	0.000242332	bulk	DOWN	ANKRD36	NEU
PEG3	-1.64836	0.00349037	0.0102826	bulk	DOWN	PEG3	NEU
NKTR	-1.65723	1.66808e-05	0.000280087	bulk	DOWN	NKTR	NEU
CYP2C9	-1.66	0.000430007	0.00210367	bulk	DOWN	CYP2C9	NEU
PILRB	-1.72181	0.000185579	0.00116976	bulk	DOWN	PILRB	NEU
ZMAT1	-1.72233	2.25031e-05	0.000329454	bulk	DOWN	ZMAT1	NEU
ALB	-1.96873	0.000796297	0.0032938	bulk	DOWN	ALB	NEU
SLC25A27	-2.02919	3.25213e-05	0.000404407	bulk	DOWN	SLC25A27	NEU
