# Supplementary material for: Subtypes and proliferation patterns of small intestine neuroendocrine tumors revealed by single-cell RNA sequencing
Source: eLife. 2025 Jul 23;13:RP101153. doi: 10.7554/eLife.101153 (PMC12286602; doi:10.7554/eLife.101153)
Supplement: Supplementary file 5. [file elife-101153-supp5.xlsx]

## Sheet: table_S5
Neuroendocrine	Progenitor	Epithelial	Senescence	G1S	G2M
PEG10	TCF4	LY6D	SPRR3	MCM5	HMGB2
TUBA1A	MALAT1	CRABP2	S100A8	PCNA	BIRC5
BEX1	UNG	MT1X	IVL	TYMS	UBE2C
NEUROD1	NASP	KRT17	NCCRP1	FEN1	CKS1B
UCHL1	HES6	S100A10	LYPD2	MCM2	AURKB
TMSB15A	BCL2	IFITM3	PSCA	MCM4	CDK1
BEX3	PHF14	KRT8	SLURP2	RRM1	NUSAP1
TUBB2B	AC245297.3	KRT19	KRT6C	GINS2	TPX2
GKAP1	UBE2QL1	NEAT1	A2ML1	MCM6	TOP2A
MAP2	DKC1	S100A2	LCN2	CDCA7	NDC80
NEUROD4	MSI2	GABRP	CST6	DTL	CKS2
PPP1R17	HSPD1	KRT18	S100A9	PRIM1	NUF2
AP1S2	CHD6	KRT5	SAMD9	UHRF1	MKI67
STMN1	ODC1	S100A11	LMO7	HELLS	TMPO
MLLT11	PROX1	AGR2	NDRG2	RFC2	CENPF
CRABP1	C1QBP	GBP1	KRT13	RPA2	TACC3
HPCA	RUVBL1	CYBA	MFSD4A	RAD51AP1	SMC4
SCG3	WDR43	CD74	SCEL	GMNN	CCNB2
TUBB3	YBX3	KRT7	SPRR1B	WDR76	CKAP2
SYT1	MEX3A	DEFB1	RHCG	SLBP	BUB1
CHGB	PNN	TNFRSF12A	PRSS27	CCNE2	KIF11
HMGN2	EIF3A	S100A13	KLK5	POLD3	ANP32E
CRMP1	SNHG5	RBP1	ECM1	MSH2	TUBB4B
MAP1B	NCL	SFN	KLK7	ATAD2	GTSE1
INSM1	CCT2	SLC2A1	SLURP1	RRM2	KIF20B
ELAVL3	TAF1D	HES1	MALL	CDC6	HJURP
PKIB	BCLAF1	H19	PRDM1	TIPIN	CDCA3
UBE2S	PRMT1	MT-CO1	MUC15	DSCC1	CDC20
CPE	HNRNPAB	FGFBP1	CD177	BLM	TTK
PRL	NELFCD	SAT1	S100A7	CASP8AP2	KIF2C
A1BG	ZFHX3	LMNA	CLIC3	USP1	RANGAP1
SOX11	HNRNPM	IL32	EPHA2	CLSPN	NCAPD2
SSTR2	LARS	C19orf33	CNFN	POLA1	DLGAP5
STMN2	ZNHIT6	TM4SF1	EMP1	HIST1H4C	CDCA8
IGKC	ARGLU1	IER3	F3	MELK	CCNB1
PALMD	RSL1D1	S100A16	KLK6	CENPK	PLK1
PTMS	ZMIZ1	IFI27	SLK	TK1	KNSTRN
SRP14	NOP14	S100A6	METRNL	TMEM106C	RACGAP1
CBX1	ANKRD11	KRT16	TIMP2	CDCA5	TROAP
GNG8	ATRX	FOSB	DNAJB2	MCM3	AURKA
IGFBPL1	SINHCAF	LY6E	MACC1	CENPM	KPNA2
SKA2	AKAP9	DDIT4	ITGB8	ASF1B	ECT2
BASP1	PHF3	CD9	NIBAN2	DUT	BUB1B
PTTG1	PDCD2	ANXA2	AHR	MCM7	TUBA1C
CADM1	PRPF4B	HLA-B	GRHL1	ZWINT	ARL6IP1
TCEAL9	APRT	MYL9	PPP1CB		KIF4A
SYT11	PBX1	JUN	ZBTB7B		MZT1
SNHG32	MTR	TAPBP	TAX1BP1		KIFC1
CCDC88A	SNHG17	IFI6	ST3GAL4		CDC25B
RPRM	NHP2	HES4	KRT80		FOXM1
CAMK2N1	PRPF38B				GPSM2
CEP170	MSH6				HMGB3
NFIA	G3BP1				ARHGAP11A
MYEF2	SOX4				H2AFZ
CDK5R1	RRP15
EIF1B	PUM3
SRSF10	PDCD11
TERF2IP	DDX21
TSPYL4	GAS5
AMER2	LINC00665
KPNA5	SMARCC1
SEC62	PEBP1
	RPF2
	KCNQ1OT1
	SORD
	TRMT10C
	HSF2
	HNRNPU
	BX890604.2
	NOLC1
	SSB
	SYNCRIP
	SHPRH
	BZW2
	ATXN7L3B
	NCBP2
